# Supplementary material for: Design of N-cinnamyl sulfinamides as new sulfur-containing olefin ligands for asymmetric catalysis: achieving structural simplicity with a categorical linear framework
Source: Royal Society of Chemistry journal article supplement (doi:10.1039/c2ob06723d), 2011-12-01

Supplementary Information for:

# Design of *N*-Cinnamyl Sulfinamides as New Sulfur-Containing Olefin Ligands for Asymmetric Catalysis: Achieving Structural Simplicity with a Categorical Linear Framework

Shen-Shuang Jin, Hui Wang, Ting-Shun Zhu, and Ming-Hua Xu\*

*Shanghai Institute of Materia Medica, Chinese Academy of Sciences, 555 Zuchongzhi Road, Shanghai 201203, China.*

[xumh@mail.shcnc.ac.cn](mailto:xumh@mail.shcnc.ac.cn)

## Table of Contents

|                                                                                   |       |
|-----------------------------------------------------------------------------------|-------|
| 1. General .....                                                                  | 2     |
| 2. Synthesis of ligands... ..                                                     | 2     |
| 3. General procedures for Rh-Catalyzed 1,4-additions. ....                        | 2     |
| 4. Characterization data of ligand compounds.....                                 | 3-4   |
| 5. Characterization data and HPLC of addition products .....                      | 5-27  |
| 6. Copies of <sup>1</sup> H and <sup>13</sup> C NMR for ligands 1a-i .....        | 28-36 |
| 7. Copies of <sup>1</sup> H and <sup>13</sup> C NMR for ligand 1b-Rh complex..... | 37-39 |

## 1. General

NMR spectra were recorded on a Varian spectrometer (300 MHz for  $^1\text{H}$ , and 100 MHz for  $^{13}\text{C}$ ). Chemical shifts are reported in  $\delta$  ppm referenced to an internal  $\text{SiMe}_4$  standard for  $^1\text{H}$  NMR and chloroform-*d* ( $\delta$  77.16) for  $^{13}\text{C}$  NMR. HPLC was performed on a JASCO 2000 instrument by using Daicel chiral columns.

## 2. Synthesis of ligands.

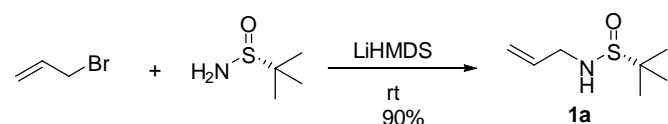

Under  $\text{N}_2$  atmosphere, 2 mL of LiHMDS (1 M in THF, 2 mmol) was added to a solution of (*R*)-*tert*-butanesulfinamide (121 mg, 1 mmol) in 5 mL THF at room temperature. After 15 minutes, allyl bromide (1.6 mL, 2 mmol) was added to the mixture and the reaction was stirred for 2 hours at room temperature. When the reaction was complete, 10 mL of water was added. The solution was extracted with ethyl acetate, dried over anhydrous  $\text{Na}_2\text{SO}_4$ , and concentrated under reduced pressure. Purification by flash column chromatography gave the product **1a** as colorless oil (145 mg, 90% yield).

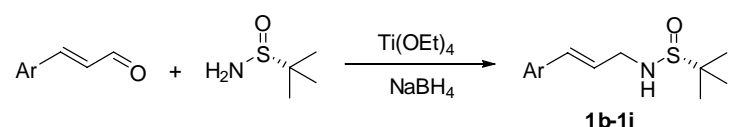

Typical procedure for **1b**: A solution of cinnamaldehyde (1.9 mL, 15 mmol), (*R*)-*tert*-butanesulfinamide (1.21 g, 10 mmol) and  $\text{Ti}(\text{OEt})_4$  (4.1 mL, 20 mmol) in 30 mL THF was heated to reflux for 4 hours. Then the reaction was cooled to room temperature and  $\text{NaBH}_4$  (1.52 g, 40 mmol). The mixture was stirred at room temperature for additional 2 hours. When the reaction was complete, methanol was added dropwise until there was no bubble. The mixture was poured to 30 mL of brine, stirred for a while and filtered. The filtrate was extracted with ethyl acetate, dried over anhydrous  $\text{Na}_2\text{SO}_4$ , and concentrated under reduced pressure. Purification by flash column chromatography gave the product **1b** as a white solid (2.15 g, 91% yield).

## 3. General procedures for Rh-Catalyzed 1,4-additions.

Under  $\text{N}_2$  atmosphere, a solution of  $[\text{RhCl}(\text{C}_2\text{H}_4)_2]_2$  (1.5 mg, 0.00375 mmol of Rh), **1b** (1.8 mg, 0.0075 mmol), and arylboronic acid (0.60 mmol) in 0.5 mL of dioxane was stirred at 40  $^\circ\text{C}$  for 30 min. To this mixture were added the  $\alpha,\beta$ -unsaturated carbonyl compounds (0.25 mmol) and then aqueous  $\text{K}_3\text{PO}_4$  (83  $\mu\text{L}$ , 1.5 M, 0.125 mmol). After being stirred at 40  $^\circ\text{C}$  for 0.5-1 h, the mixture was concentrated under reduced pressure. The residue was purified by silica gel column chromatography to afford the corresponding addition product **3**.

#### 4. Characterization data of ligand compounds.

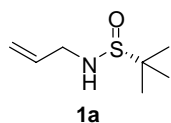

$^1\text{H}$  NMR (300 MHz,  $\text{CDCl}_3$ ):  $\delta$  1.23 (s, 9H), 3.29 (s, 1H), 3.67-3.86 (m, 2H), 5.16 (dd,  $J = 10.2, 1.2$  Hz, 1H), 5.27 (dd,  $J = 17.1, 1.5$  Hz, 1H), 5.85-5.98 (m, 1H);  $^{13}\text{C}$  NMR (100 MHz,  $\text{CDCl}_3$ ):  $\delta$  22.67, 48.20, 55.78, 117.12, 135.30; ESI-MS: 162.0  $[\text{M} + \text{H}]^+$ , 322.9  $[2\text{M} + \text{H}]^+$ ; HRMS (ESI) for  $\text{C}_7\text{H}_{15}\text{NOSNa}$   $[\text{M} + \text{Na}]^+$ : calcd 184.0772, found 184.0764.

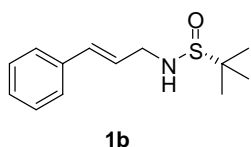

$^1\text{H}$  NMR (300 MHz,  $\text{CDCl}_3$ ):  $\delta$  1.24 (s, 9H), 3.35 (t,  $J = 5.7$  Hz, 1H), 3.82-4.01 (m, 2H), 6.25 (dt,  $J = 15.9, 6.6$  Hz, 1H), 6.58 (d,  $J = 15.9$  Hz, 1H), 7.24-7.39 (m, 5H);  $^{13}\text{C}$  NMR (100 MHz,  $\text{CDCl}_3$ ):  $\delta$  22.74, 47.97, 55.88, 126.55, 127.89, 128.67, 132.66, 136.51; ESI-MS: 238.0  $[\text{M} + \text{H}]^+$ , 475.0  $[2\text{M} + \text{H}]^+$ ; HRMS (ESI) for  $\text{C}_{13}\text{H}_{19}\text{NOSNa}$   $[\text{M} + \text{Na}]^+$ : calcd 260.1085, found 260.1070.

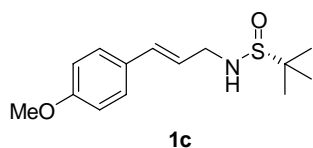

$^1\text{H}$  NMR (300 MHz,  $\text{CDCl}_3$ ):  $\delta$  1.24 (s, 9H), 3.34 (t,  $J = 5.4$  Hz, 1H), 3.80 (s, 3H), 3.83-3.98 (m, 2H), 6.11 (dt,  $J = 15.6, 6.6$  Hz, 1H), 6.52 (d,  $J = 15.6$  Hz, 1H), 6.85 (d,  $J = 8.1$  Hz, 2H), 7.31 (d,  $J = 8.4$  Hz, 2H);  $^{13}\text{C}$  NMR (100 MHz,  $\text{CDCl}_3$ ):  $\delta$  22.75, 48.13, 55.37, 55.86, 114.07, 124.26, 127.76, 129.29, 132.22, 159.43; ESI-MS: 267.9  $[\text{M} + \text{H}]^+$ , 535.0  $[2\text{M} + \text{H}]^+$ ; HRMS (ESI) for  $\text{C}_{14}\text{H}_{22}\text{NO}_2\text{S}$   $[\text{M} + \text{H}]^+$ : calcd 268.1371, found 268.1360.

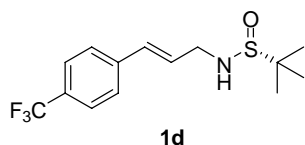

$^1\text{H}$  NMR (300 MHz,  $\text{CDCl}_3$ ):  $\delta$  1.25 (s, 9H), 3.72 (t,  $J = 5.4$  Hz, 1H), 3.85-4.03 (m, 2H), 6.36 (dt,  $J = 15.6, 6.3$  Hz, 1H), 6.61 (d,  $J = 15.6$  Hz, 1H), 7.46 (d,  $J = 8.1$  Hz, 2H), 7.55 (d,  $J = 8.1$  Hz, 2H);  $^{13}\text{C}$  NMR (100 MHz,  $\text{CDCl}_3$ ):  $\delta$  22.59, 47.65, 55.89, 125.39, 125.43, 125.46, 126.60, 129.51, 130.86, 140.00; ESI-MS: 306.0  $[\text{M} + \text{H}]^+$ , 610.9  $[2\text{M} + \text{H}]^+$ ; HRMS (ESI) for  $\text{C}_{14}\text{H}_{19}\text{F}_3\text{NOS}$   $[\text{M} + \text{H}]^+$ : calcd 306.1139, found 306.1124.

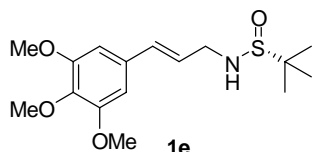

$^1\text{H}$  NMR (300 MHz,  $\text{CDCl}_3$ ):  $\delta$  1.25 (s, 9H), 3.47 (s, 1H), 3.84 (s, 3H), 3.87 (s, 6H), 3.84-4.00 (m, 2H), 6.19 (dt,  $J = 15.6, 6.6$  Hz, 1H), 6.50 (d,  $J = 15.6$  Hz, 1H), 6.61 (s, 2H);  $^{13}\text{C}$  NMR

(100 MHz, CDCl<sub>3</sub>):  $\delta$  22.62, 47.88, 55.79, 56.02, 60.85, 103.47, 126.01, 132.18, 132.46, 137.84, 153.23; ESI-MS: 327.9 [M + H]<sup>+</sup>, 655.1 [2M + H]<sup>+</sup>; HRMS (ESI) for C<sub>16</sub>H<sub>25</sub>NO<sub>4</sub>SNa [M + Na]<sup>+</sup>: calcd 350.1402, found 350.1381.

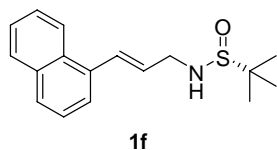

<sup>1</sup>H NMR (300 MHz, CDCl<sub>3</sub>):  $\delta$  1.26 (s, 9H), 3.45 (t, *J* = 5.4 Hz, 1H), 3.93-4.15 (m, 2H), 6.28 (dt, *J* = 15.6, 6.3 Hz, 1H), 7.34 (d, *J* = 15.3 Hz, 1H), 7.40-7.59 (m, 4H), 7.77 (d, *J* = 8.1 Hz, 1H), 7.84 (d, *J* = 8.7 Hz, 1H), 8.09 (d, *J* = 7.8 Hz, 1H); <sup>13</sup>C NMR (100 MHz, CDCl<sub>3</sub>):  $\delta$  22.78, 48.17, 55.94, 123.76, 124.08, 125.66, 125.91, 126.25, 128.24, 128.62, 129.81, 129.83, 131.16, 133.65, 134.30; ESI-MS: 288.0 [M + H]<sup>+</sup>, 575.0 [2M + H]<sup>+</sup>; HRMS (ESI) for C<sub>17</sub>H<sub>21</sub>NOSNa [M + Na]<sup>+</sup>: calcd 310.1242, found 310.1224.

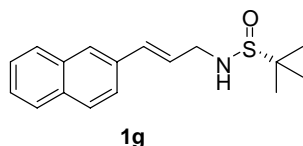

<sup>1</sup>H NMR (300 MHz, CDCl<sub>3</sub>):  $\delta$  1.26 (s, 9H), 3.37 (s, 1H), 3.90-4.05 (m, 2H), 6.38 (dt, *J* = 15.6, 6.6 Hz, 1H), 6.74 (d, *J* = 15.6 Hz, 1H), 7.44-7.46 (m, 2H), 7.59 (d, *J* = 8.4 Hz, 1H), 7.73-7.84 (m, 4H); <sup>13</sup>C NMR (100 MHz, CDCl<sub>3</sub>):  $\delta$  22.80, 48.18, 55.99, 123.63, 126.11, 126.44, 126.64, 126.96, 127.78, 128.11, 128.38, 132.80, 133.17, 133.64, 134.00; ESI-MS: 287.9 [M + H]<sup>+</sup>, 575.0 [2M + H]<sup>+</sup>; HRMS (ESI) for C<sub>17</sub>H<sub>22</sub>NOS [M + H]<sup>+</sup>: calcd 288.1422, found 288.1409.

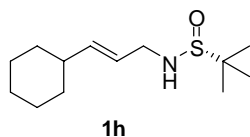

<sup>1</sup>H NMR (300 MHz, CDCl<sub>3</sub>):  $\delta$  0.99-1.28 (m, 6H), 1.22 (s, 9H), 1.62-1.72 (m, 4H), 1.91-2.00 (m, 2H), 3.18 (t, *J* = 5.4 Hz, 1H), 3.58-3.78 (m, 2H), 5.45 (dt, *J* = 15.3, 6.3 Hz, 1H), 5.61 (dd, *J* = 15.3, 6.6 Hz, 1H); <sup>13</sup>C NMR (100 MHz, CDCl<sub>3</sub>):  $\delta$  22.72, 26.04, 26.18, 32.80, 32.81, 40.41, 47.99, 55.69, 124.27, 140.17; ESI-MS: 244.1 [M + H]<sup>+</sup>, 487.1 [2M + H]<sup>+</sup>; HRMS (ESI) for C<sub>13</sub>H<sub>26</sub>NOS [M + H]<sup>+</sup>: calcd 244.1735, found 244.1722.

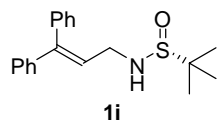

<sup>1</sup>H NMR (300 MHz, CDCl<sub>3</sub>):  $\delta$  1.21 (s, 9H), 3.42 (t, *J* = 4.5 Hz, 1H), 3.73-3.92 (m, 2H), 6.14 (t, *J* = 6.6 Hz, 1H), 7.16-7.39 (m, 10H); <sup>13</sup>C NMR (100 MHz, CDCl<sub>3</sub>):  $\delta$  22.65, 44.93, 55.79, 125.63, 127.52, 127.60, 128.18, 128.36, 129.67, 138.89, 141.66, 144.41; ESI-MS: 314.0 [M + H]<sup>+</sup>, 627.0 [2M + H]<sup>+</sup>; HRMS (ESI) for C<sub>19</sub>H<sub>24</sub>NOS [M + H]<sup>+</sup>: calcd 314.1579, found 314.1564.

## 5. Characterization data and HPLC of addition products.

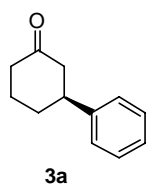

$^1\text{H NMR}$  (300 MHz,  $\text{CDCl}_3$ ):  $\delta$  1.70-1.92 (m, 2H), 2.05-2.20 (m, 2H), 2.35-2.62 (m, 4H), 2.95-3.08 (m, 1H), 7.19-7.25 (m, 3H), 7.34 (t,  $J = 7.8$  Hz, 2H).  $[\alpha]_{\text{D}}^{20}$  -19.6 (c 1.30,  $\text{CHCl}_3$ ) for 97% ee [Lit. 1:  $[\alpha]_{\text{D}}^{23}$  -19.5 (c 0.95,  $\text{CHCl}_3$ ) for 93% ee of the *S*-isomer; *Org. Lett.*, **2008**, *10*, 4101; Lit. 2:  $[\alpha]_{\text{D}}^{20}$  -21 (c 0.96,  $\text{CHCl}_3$ ) for 97% ee of the *S*-isomer; *J. Am. Chem. Soc.* **1998**, *120*, 5579.]

HPLC: Chiralcel OJ-H Column (250 mm); detected at 214 nm; *n*-hexane / *i*-propanol = 90/10; flow = 0.7 mL/min; Retention time: 13.4 min, 15.5 min (maj).

Ref: Takaya, Y.; Ogasawara, M.; Hayashi, T. *J. Am. Chem. Soc.* **1998**, *120*, 5579.

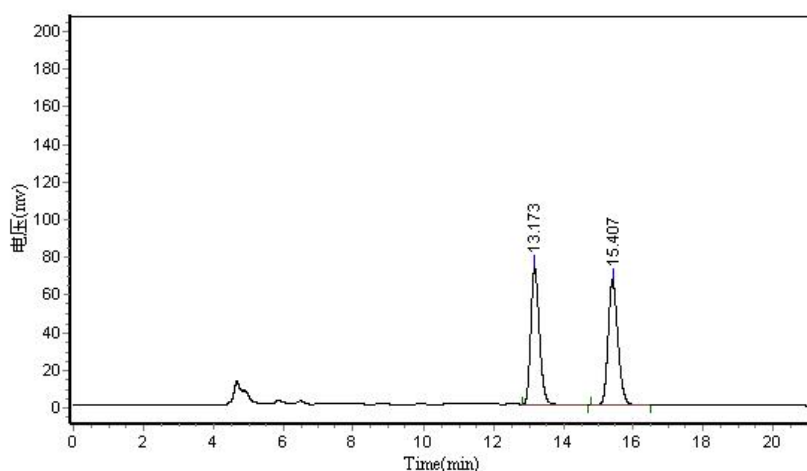

Results

| Peak No.     | Peak ID | Ret Time | Height     | Area        | Conc.    |
|--------------|---------|----------|------------|-------------|----------|
| 1            |         | 13.173   | 72456.828  | 1247548.000 | 49.1282  |
| 2            |         | 15.407   | 66176.023  | 1291822.500 | 50.8718  |
| <b>Total</b> |         |          | 138632.852 | 2539370.500 | 100.0000 |

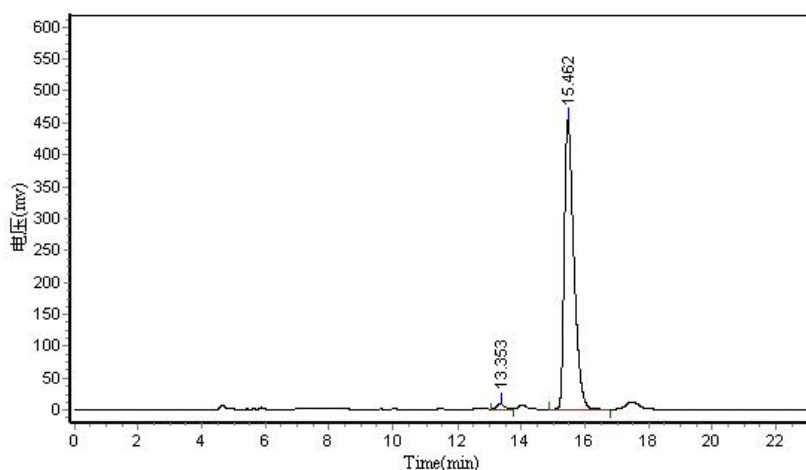

Results

| Peak No.     | Peak ID | Ret Time | Height     | Area        | Conc.    |
|--------------|---------|----------|------------|-------------|----------|
| 1            |         | 13.353   | 9183.676   | 152296.094  | 1.5873   |
| 2            |         | 15.462   | 452863.594 | 9442373.000 | 98.4127  |
| <b>Total</b> |         |          | 462047.270 | 9594669.094 | 100.0000 |

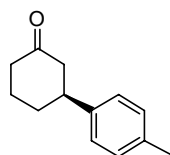

3b

$^1\text{H}$  NMR (300 MHz,  $\text{CDCl}_3$ ):  $\delta$  1.73-1.94 (m, 2H), 2.05-2.17 (m, 2H), 2.31-2.60 (m, 4H), 2.33 (s, 3H), 2.94-3.02 (m, 1H), 7.11 (d,  $J = 8.7$  Hz, 2H), 7.15 (d,  $J = 8.7$  Hz, 2H).

HPLC: Chiralpak AD-H Column (250 mm); detected at 214 nm; *n*-hexane / *i*-propanol = 95/5; flow = 0.7 mL/min; Retention time: 8.6 min (maj), 9.5 min.

Ref: Takaya, Y.; Ogasawara, M.; Hayashi, T. *J. Am. Chem. Soc.* **1998**, *120*, 5579.

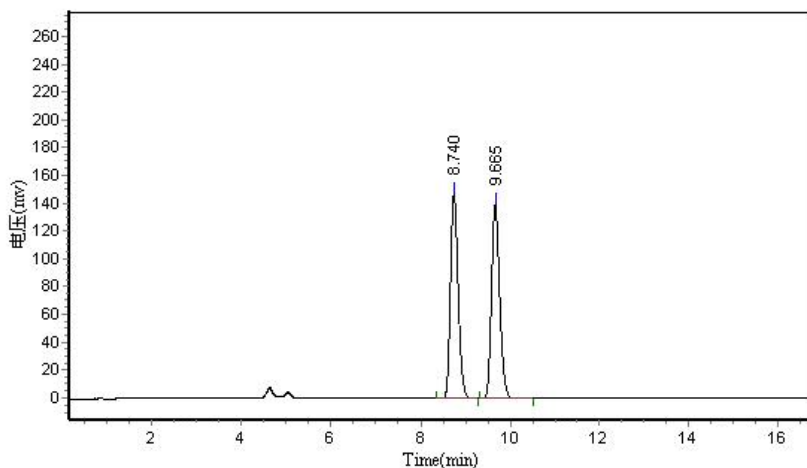

Results

| Peak No.     | Peak ID | Ret Time | Height     | Area        | Conc.    |
|--------------|---------|----------|------------|-------------|----------|
| 1            |         | 8.740    | 147199.172 | 1768476.250 | 49.9290  |
| 2            |         | 9.665    | 138828.344 | 1773508.750 | 50.0710  |
| <b>Total</b> |         |          | 286027.516 | 3541985.000 | 100.0000 |

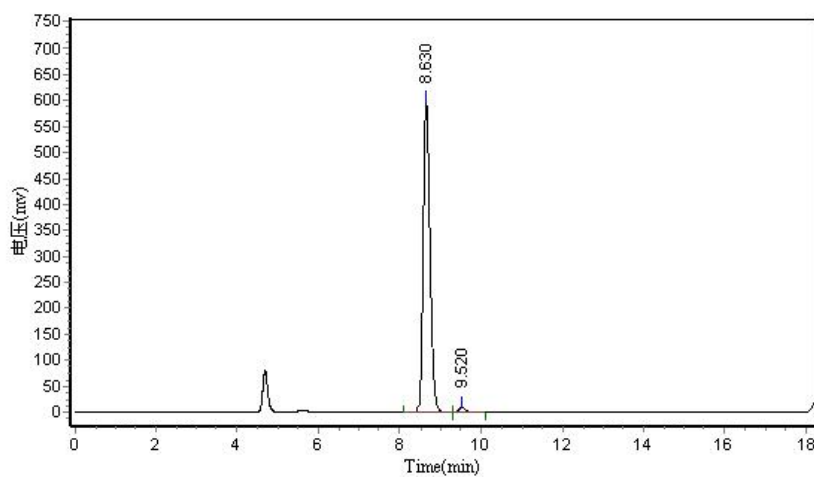

Results

| Peak No.     | Peak ID | Ret Time | Height     | Area        | Conc.    |
|--------------|---------|----------|------------|-------------|----------|
| 1            |         | 8.630    | 596343.500 | 6922119.000 | 98.2153  |
| 2            |         | 9.520    | 10202.115  | 125785.039  | 1.7847   |
| <b>Total</b> |         |          | 606545.615 | 7047904.039 | 100.0000 |

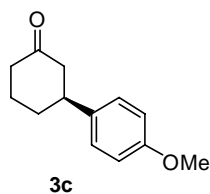

$^1\text{H NMR}$  (300 MHz,  $\text{CDCl}_3$ ):  $\delta$  1.73-1.88 (m, 2H), 2.05-2.16 (m, 2H), 2.36-2.61 (m, 4H), 2.92-3.01 (m, 1H), 3.80 (s, 3H), 6.87 (d,  $J = 7.8$  Hz, 2H), 7.14 (d,  $J = 8.1$  Hz, 2H).

HPLC: Chiralpak AD-H Column (250 mm); detected at 214 nm; *n*-hexane / *i*-propanol = 90/10; flow = 0.7 mL/min; Retention time: 11.2 min (maj), 12.0 min.

Ref: Cho, C. S.; Motofusa, S.; Ohe, K.; Uemura, S. *J. Org. Chem.* **1995**, *60*, 883.

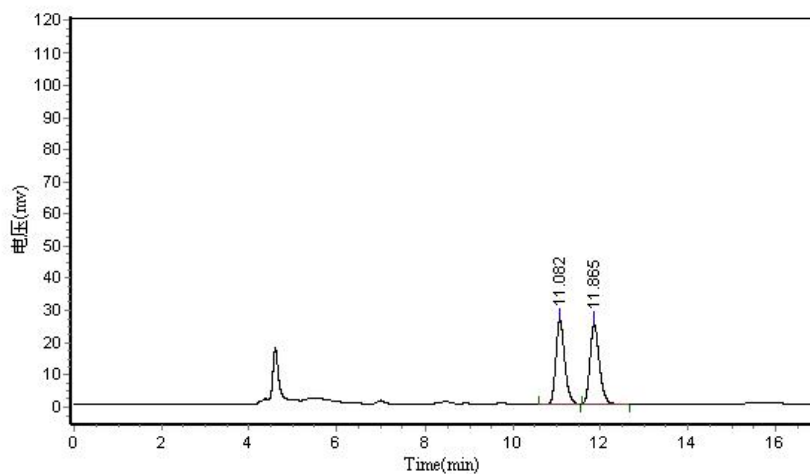

Results

| Peak No.     | Peak ID | Ret Time | Height    | Area       | Conc.    |
|--------------|---------|----------|-----------|------------|----------|
| 1            |         | 11.082   | 26127.211 | 368003.719 | 49.7049  |
| 2            |         | 11.865   | 24887.816 | 372373.969 | 50.2951  |
| <b>Total</b> |         |          | 51015.027 | 740377.688 | 100.0000 |

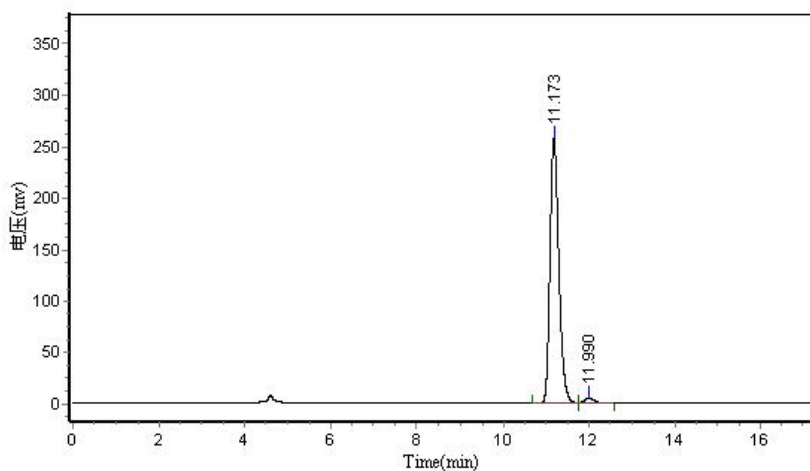

Results

| Peak No.     | Peak ID | Ret Time | Height     | Area        | Conc.    |
|--------------|---------|----------|------------|-------------|----------|
| 1            |         | 11.173   | 257124.875 | 3695915.000 | 97.7735  |
| 2            |         | 11.990   | 5318.716   | 84164.773   | 2.2265   |
| <b>Total</b> |         |          | 262443.591 | 3780079.773 | 100.0000 |

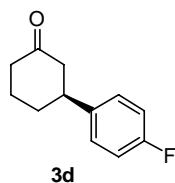

$^1\text{H}$  NMR (300 MHz,  $\text{CDCl}_3$ ):  $\delta$  1.75-1.89 (m, 2H), 2.05-2.17 (m, 2H), 2.37-2.61 (m, 4H), 2.95-3.04 (m, 1H), 6.99-7.04 (m, 2H), 7.16-7.20 (m, 2H).  
HPLC: Chiralcel OJ-H Column (250 mm); detected at 214 nm; *n*-hexane / *i*-propanol = 90/10; flow = 0.7 mL/min; Retention time: 14.7 min, 15.9 min (maj).

Ref: Hayashi, T.; Takahashi, M.; Takaya, Y.; Ogasawara, M. *J. Am. Chem. Soc.* **2002**, *124*, 5052.

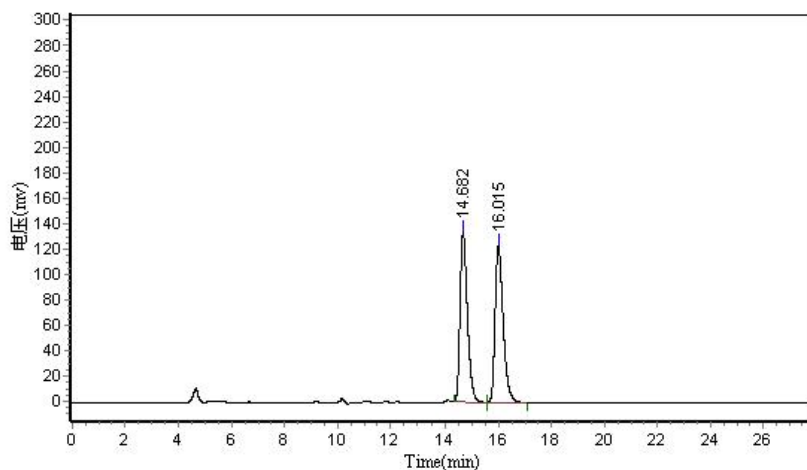

**Results**

| Peak No.     | Peak ID | Ret Time | Height     | Area        | Conc.    |
|--------------|---------|----------|------------|-------------|----------|
| 1            |         | 14.682   | 133924.609 | 2598232.250 | 49.7400  |
| 2            |         | 16.015   | 123799.938 | 2625395.500 | 50.2600  |
| <b>Total</b> |         |          | 257724.547 | 5223627.750 | 100.0000 |

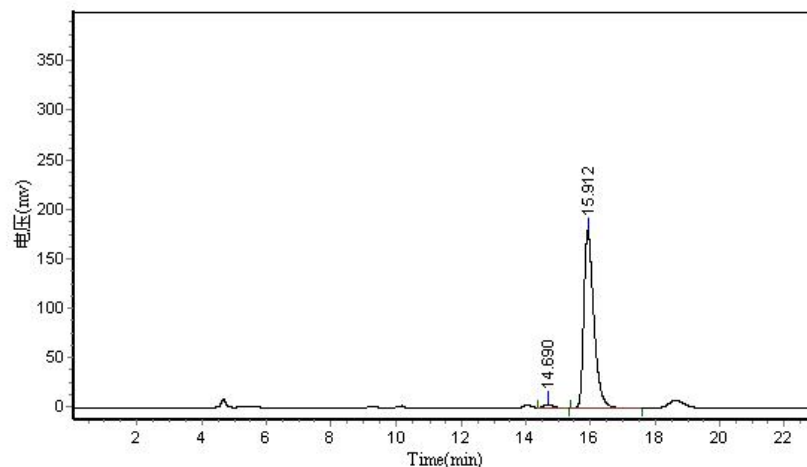

**Results**

| Peak No.     | Peak ID | Ret Time | Height     | Area        | Conc.    |
|--------------|---------|----------|------------|-------------|----------|
| 1            |         | 14.690   | 3343.608   | 59528.695   | 1.5290   |
| 2            |         | 15.912   | 179016.031 | 3833900.750 | 98.4710  |
| <b>Total</b> |         |          | 182359.640 | 3893429.445 | 100.0000 |



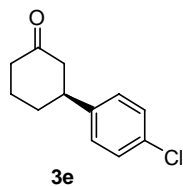

$^1\text{H}$  NMR (300 MHz,  $\text{CDCl}_3$ ):  $\delta$  1.74-1.89 (m, 2H), 2.05-2.19 (m, 2H), 2.32-2.61 (m, 4H), 2.94-3.04 (m, 1H), 7.15 (d,  $J = 8.1$  Hz, 2H), 7.30 (d,  $J = 8.4$  Hz, 2H).

HPLC: Chiralpak AD-H Column (250 mm); detected at 214 nm; *n*-hexane / *i*-propanol = 95/5; flow = 0.7 mL/min; Retention time: 11.0 min (maj), 11.9 min.

Ref: Cho, C. S.; Motofusa, S.; Ohe, K.; Uemura, S. *J. Org. Chem.* **1995**, *60*, 883.

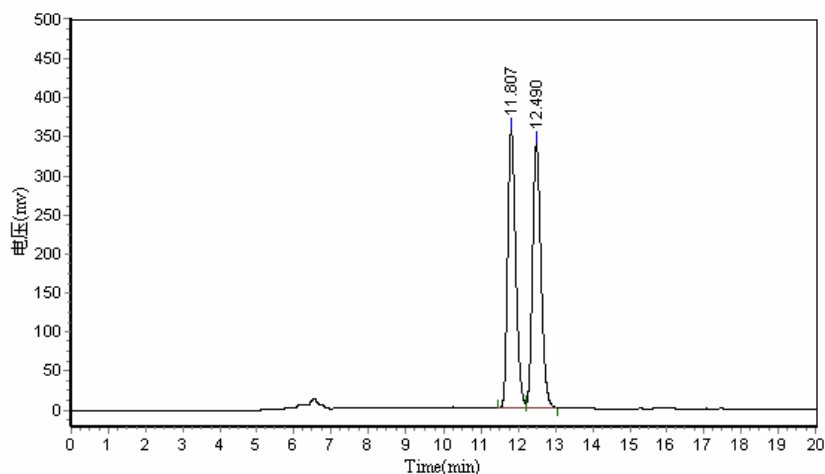

Results

| Peak No.     | Peak ID | Ret Time | Height     | Area         | Conc.    |
|--------------|---------|----------|------------|--------------|----------|
| 1            |         | 11.807   | 354797.813 | 5362085.000  | 49.7534  |
| 2            |         | 12.490   | 338781.063 | 5415236.000  | 50.2466  |
| <b>Total</b> |         |          | 693578.875 | 10777321.000 | 100.0000 |

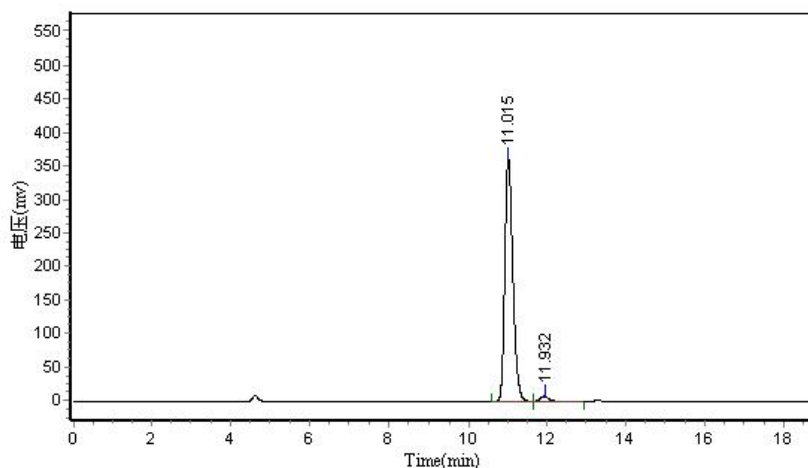

Results

| Peak No.     | Peak ID | Ret Time | Height     | Area        | Conc.    |
|--------------|---------|----------|------------|-------------|----------|
| 1            |         | 11.015   | 361329.688 | 5109656.000 | 97.7947  |
| 2            |         | 11.932   | 7515.633   | 115224.148  | 2.2053   |
| <b>Total</b> |         |          | 368845.321 | 5224880.148 | 100.0000 |

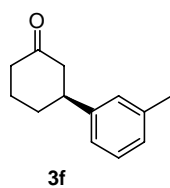

$^1\text{H NMR}$  (300 MHz,  $\text{CDCl}_3$ ):  $\delta$  1.75-1.91 (m, 2H), 2.05-2.18 (m, 2H), 2.35 (s, 3H), 2.35-2.62 (m, 4H), 2.92-3.01 (m, 1H), 7.01-7.07 (m, 3H), 7.20-7.26 (m, 1H).

HPLC: Chiralcel OD-H Column (250 mm); detected at 214 nm; *n*-hexane / *i*-propanol = 90/10; flow = 0.7 mL/min; Retention time: 10.5 min (maj), 11.2 min.

min.

Ref: Boiteau, J.; Imbos, R.; Minnaard, A.; Feringa, B. *Org. Lett.*, **2003**, 5, 681.

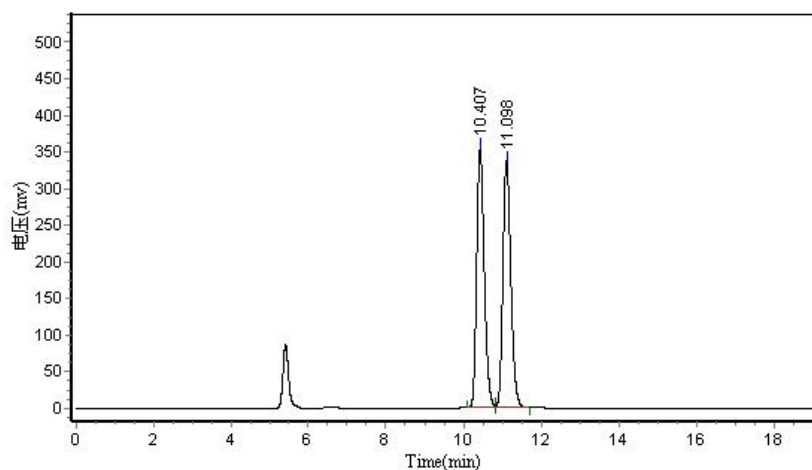

**Results**

| Peak No.     | Peak ID | Ret Time | Height     | Area        | Conc.    |
|--------------|---------|----------|------------|-------------|----------|
| 1            |         | 10.407   | 353720.344 | 4834028.000 | 50.0232  |
| 2            |         | 11.098   | 336994.813 | 4829541.500 | 49.9768  |
| <b>Total</b> |         |          | 690715.156 | 9663569.500 | 100.0000 |

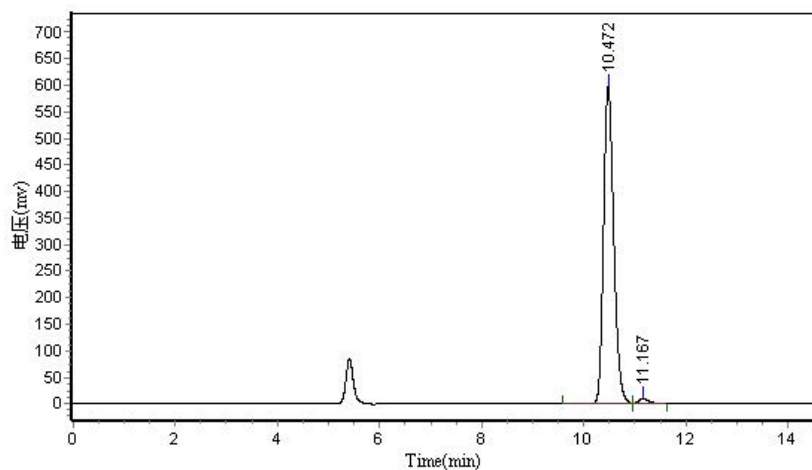

**Results**

| Peak No.     | Peak ID | Ret Time | Height     | Area        | Conc.    |
|--------------|---------|----------|------------|-------------|----------|
| 1            |         | 10.472   | 597986.125 | 8297507.000 | 98.3749  |
| 2            |         | 11.167   | 9457.029   | 137071.641  | 1.6251   |
| <b>Total</b> |         |          | 607443.154 | 8434578.641 | 100.0000 |

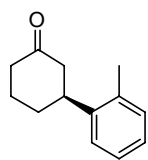

3g

$^1\text{H NMR}$  (300 MHz,  $\text{CDCl}_3$ ):  $\delta$  1.77-1.91 (m, 2H), 1.99-2.05 (m, 1H), 2.16-2.20 (m, 1H), 2.32 (s, 3H), 2.37-2.53 (m, 4H), 3.16-3.25 (m, 1H), 7.13-7.25 (m, 4H).  
HPLC: Chiralpak AD-H Column (250 mm); detected at 214 nm; *n*-hexane / *i*-propanol = 90/10; flow = 0.7 mL/min; Retention time: 7.6 min (maj), 8.6 min.

Ref: Hayashi, T.; Tokunaga, N.; Yoshida, K.; and Han, J.-W. *J. Am. Chem. Soc.*, **2002**, *124*, 12102.

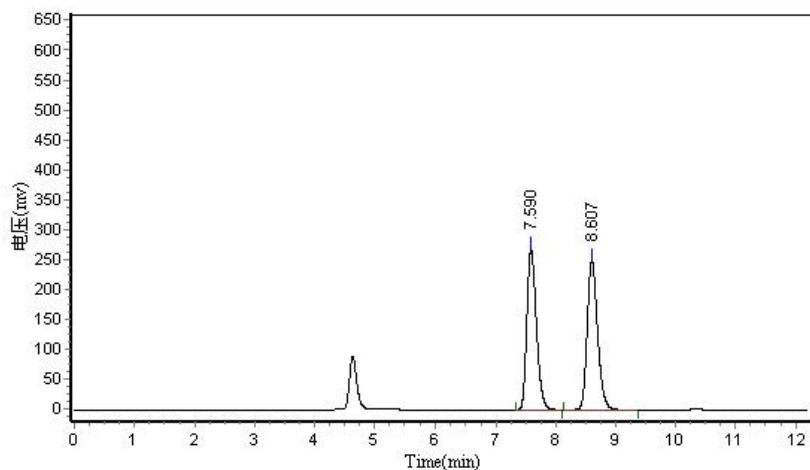

Results

| Peak No.     | Peak ID | Ret Time | Height     | Area        | Conc.    |
|--------------|---------|----------|------------|-------------|----------|
| 1            |         | 7.590    | 268902.563 | 2969217.750 | 49.7755  |
| 2            |         | 8.607    | 249240.563 | 2996002.750 | 50.2245  |
| <b>Total</b> |         |          | 518143.125 | 5965220.500 | 100.0000 |

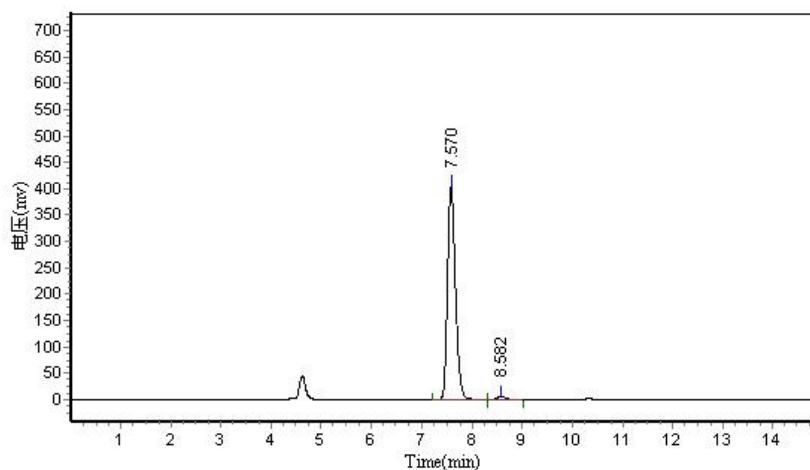

Results

| Peak No.     | Peak ID | Ret Time | Height     | Area        | Conc.    |
|--------------|---------|----------|------------|-------------|----------|
| 1            |         | 7.570    | 403765.344 | 4486009.000 | 98.4075  |
| 2            |         | 8.582    | 6142.053   | 72595.547   | 1.5925   |
| <b>Total</b> |         |          | 409907.396 | 4558604.547 | 100.0000 |

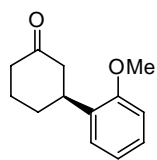

3h

$^1\text{H}$  NMR (300 MHz,  $\text{CDCl}_3$ ):  $\delta$  1.75-1.93 (m, 2H), 2.01-2.16 (m, 2H), 2.34-2.61 (m, 4H), 3.37-3.46 (m, 1H), 3.82 (s, 3H), 6.86-6.97 (m, 2H), 7.18-7.26 (m, 2H).

HPLC: Chiralpak AS-H Column (250 mm); detected at 214 nm; *n*-hexane / *i*-propanol = 60/40; flow = 0.6 mL/min; Retention time: 13.1 min, 19.3 min (maj).

Ref: Boiteau, J.; Imbos, R.; Minnaard, A.; Feringa, B. *Org. Lett.*, **2003**, 5, 681.

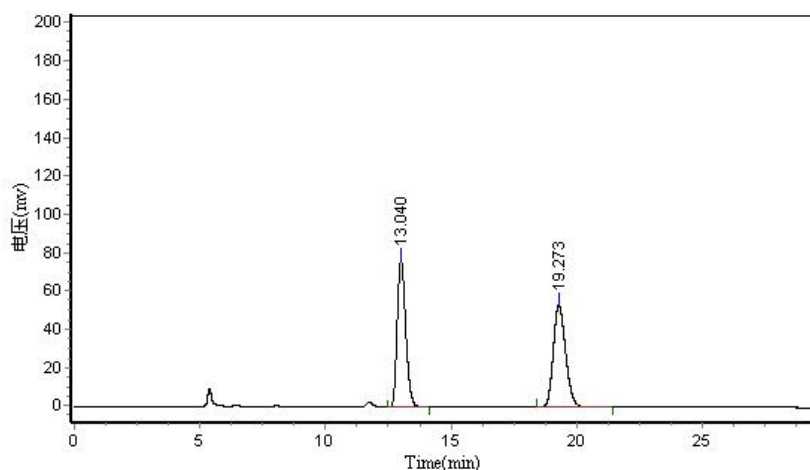

Results

| Peak No.     | Peak ID | Ret Time | Height     | Area        | Conc.    |
|--------------|---------|----------|------------|-------------|----------|
| 1            |         | 13.040   | 76358.797  | 1800745.750 | 49.6646  |
| 2            |         | 19.273   | 53523.621  | 1825068.875 | 50.3354  |
| <b>Total</b> |         |          | 129882.418 | 3625814.625 | 100.0000 |

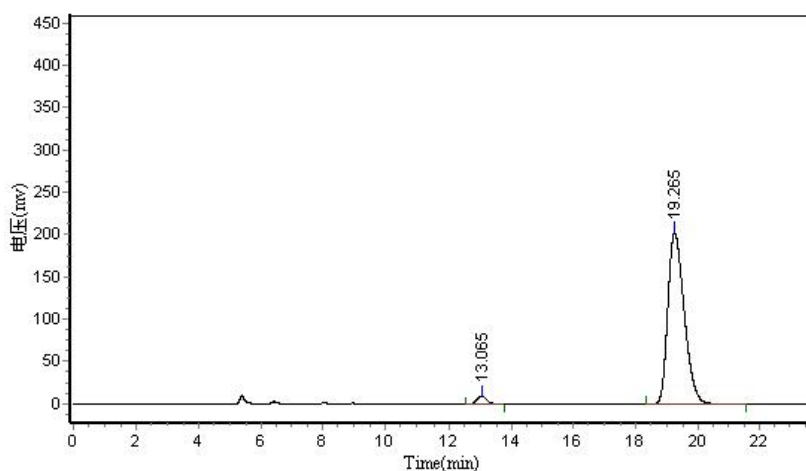

Results

| Peak No.     | Peak ID | Ret Time | Height     | Area        | Conc.    |
|--------------|---------|----------|------------|-------------|----------|
| 1            |         | 13.065   | 9349.227   | 221788.297  | 2.9117   |
| 2            |         | 19.265   | 201976.641 | 7395476.500 | 97.0883  |
| <b>Total</b> |         |          | 211325.867 | 7617264.797 | 100.0000 |

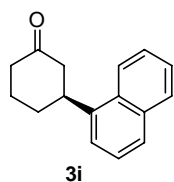

3i

$^1\text{H}$  NMR (300 MHz,  $\text{CDCl}_3$ ):  $\delta$  1.89-2.07 (m, 2H), 2.19-2.27 (m, 2H), 2.41-2.79 (m, 4H), 3.81-3.90 (m, 1H), 7.39-7.56 (m, 4H), 7.76 (d,  $J = 8.1$  Hz, 1H), 7.88 (d,  $J = 7.5$  Hz, 1H), 8.04 (d,  $J = 8.1$  Hz, 1H).

HPLC: Chiralcel OJ-H Column (250 mm); detected at 214 nm; *n*-hexane / *i*-propanol = 90/10; flow = 0.7 mL/min; Retention time: 37.0 min, 40.9 min

(maj).

Ref: Cho, C. S.; Motofusa, S.; Ohe, K.; Uemura, S. *J. Org. Chem.* **1995**, *60*, 883.

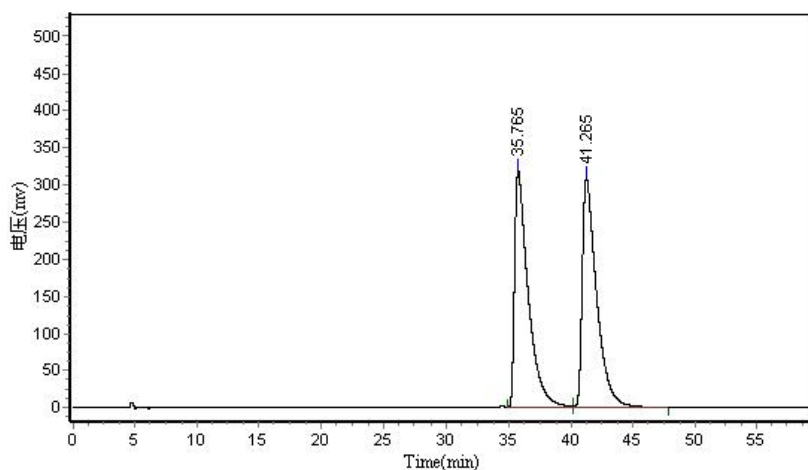

Results

| Peak No.     | Peak ID | Ret Time | Height     | Area         | Conc.    |
|--------------|---------|----------|------------|--------------|----------|
| 1            |         | 35.765   | 318032.375 | 24419586.000 | 49.4730  |
| 2            |         | 41.265   | 308339.406 | 24939842.000 | 50.5270  |
| <b>Total</b> |         |          | 626371.781 | 49359428.000 | 100.0000 |

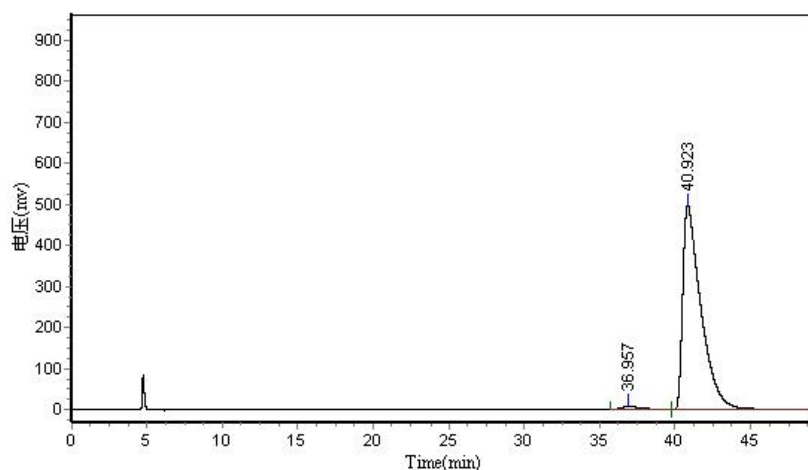

Results

| Peak No.     | Peak ID | Ret Time | Height     | Area         | Conc.    |
|--------------|---------|----------|------------|--------------|----------|
| 1            |         | 36.957   | 7349.875   | 633098.000   | 1.4928   |
| 2            |         | 40.923   | 497348.656 | 41777472.000 | 98.5072  |
| <b>Total</b> |         |          | 504698.531 | 42410570.000 | 100.0000 |

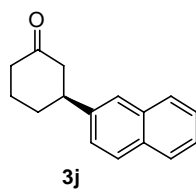

$^1\text{H}$  NMR (300 MHz,  $\text{CDCl}_3$ ):  $\delta$  1.81-2.04 (m, 2H), 2.15-2.23 (m, 2H), 2.37-2.53 (m, 2H), 2.59-2.71 (m, 2H), 3.14-3.22 (m, 1H), 7.37 (d,  $J = 8.4$  Hz, 1H), 7.45-7.47 (m, 2H), 7.64 (s, 1H), 7.79-7.83 (m, 3H).

HPLC: Chiralpak AD-H Column (250 mm); detected at 214 nm; *n*-hexane / *i*-propanol = 90/10; flow = 0.7 mL/min; Retention time: 11.2 min (maj),

12.0 min.

Ref: Takaya, Y.; Ogasawara, M.; Hayashi, T. *Tetrahedron Lett.* **1999**, *40*, 6957.

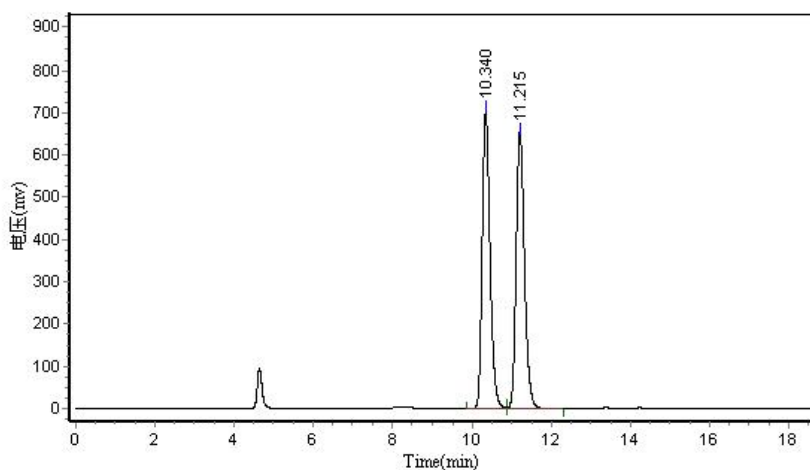

Results

| Peak No.     | Peak ID | Ret Time | Height      | Area         | Conc.    |
|--------------|---------|----------|-------------|--------------|----------|
| 1            |         | 10.340   | 700643.750  | 9661382.000  | 50.1977  |
| 2            |         | 11.215   | 652979.500  | 9585274.000  | 49.8023  |
| <b>Total</b> |         |          | 1353623.250 | 19246656.000 | 100.0000 |

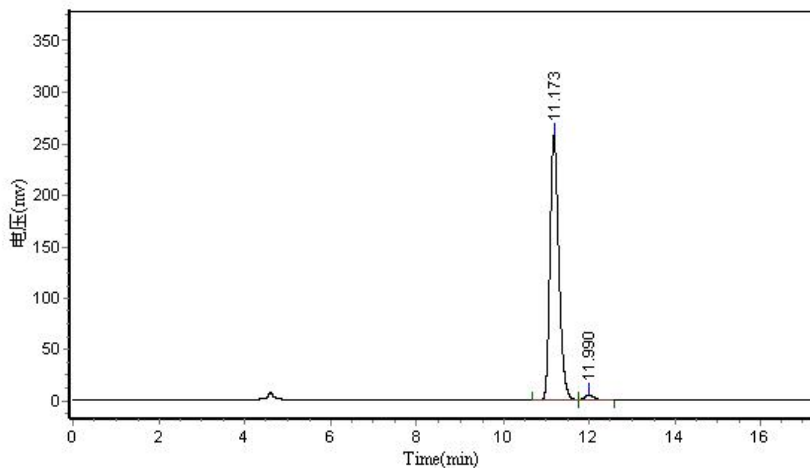

Results

| Peak No.     | Peak ID | Ret Time | Height     | Area        | Conc.    |
|--------------|---------|----------|------------|-------------|----------|
| 1            |         | 11.173   | 257124.875 | 3695915.000 | 97.7735  |
| 2            |         | 11.990   | 5318.716   | 84164.773   | 2.2265   |
| <b>Total</b> |         |          | 262443.591 | 3780079.773 | 100.0000 |

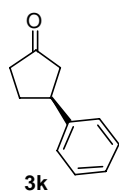

$^1\text{H NMR}$  (300 MHz,  $\text{CDCl}_3$ ):  $\delta$  1.90-2.08 (m, 1H), 2.22-2.54 (m, 4H), 2.67 (dd,  $J$  = 18.3, 7.8 Hz, 1H), 3.35-3.49 (m, 1H), 7.22-7.30 (m, 3H), 7.31-7.39 (m, 2H).  
HPLC: Chiralcel OZ-H Column (250 mm); detected at 214 nm; *n*-hexane / *i*-propanol = 99/1; flow = 1.0 mL/min; Retention time: 20.2 min, 22.5 min (maj).

Ref: Takaya, Y.; Ogasawara, M.; Hayashi, T. *J. Am. Chem. Soc.* **1998**, *120*, 5579.

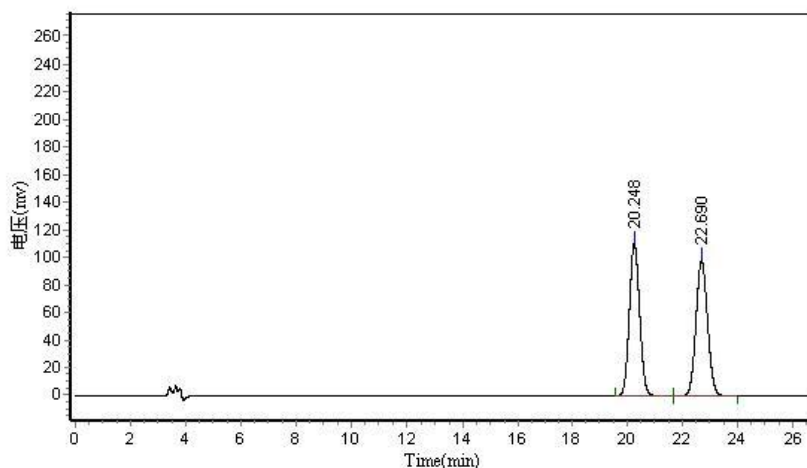

**Results**

| Peak No.     | Peak ID | Ret Time | Height     | Area        | Conc.    |
|--------------|---------|----------|------------|-------------|----------|
| 1            |         | 20.248   | 110518.664 | 2858506.500 | 49.7971  |
| 2            |         | 22.690   | 98116.148  | 2881800.500 | 50.2029  |
| <b>Total</b> |         |          | 208634.813 | 5740307.000 | 100.0000 |

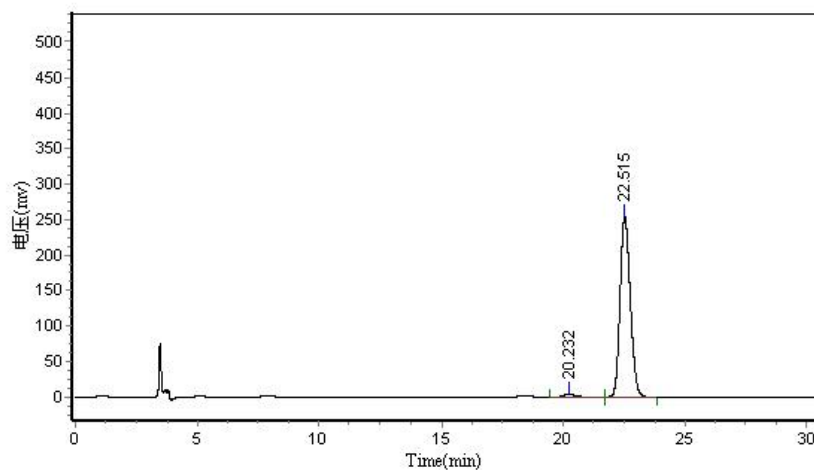

**Results**

| Peak No.     | Peak ID | Ret Time | Height     | Area        | Conc.    |
|--------------|---------|----------|------------|-------------|----------|
| 1            |         | 20.232   | 4411.511   | 130115.297  | 1.7292   |
| 2            |         | 22.515   | 254086.938 | 7394305.500 | 98.2708  |
| <b>Total</b> |         |          | 258498.449 | 7524420.797 | 100.0000 |

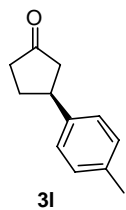

$^1\text{H NMR}$  (300 MHz,  $\text{CDCl}_3$ ):  $\delta$  1.90-2.04 (m, 1H), 2.27-2.51 (m, 4H), 2.34 (s, 3H), 2.66 (dd,  $J = 18.0, 7.5$  Hz, 1H), 3.33-3.45 (m, 1H), 7.16 (s, 4H).

HPLC: Chiralcel OZ-H Column (250 mm); detected at 214 nm; *n*-hexane / *i*-propanol = 99/1; flow = 0.5 mL/min; Retention time: 37.4 min, 39.6 min (maj).

Ref: Feng, C.-G.; Wang, Z.-Q.; Tian, P.; Xu, M.-H.; Lin, G.-Q. *Chem. Asian J.*

**2008**, *3*, 1511.

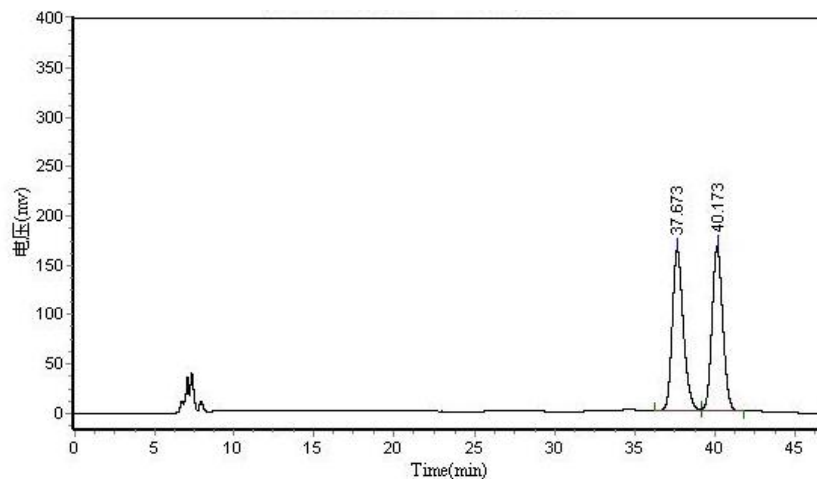

**Results**

| Peak No.     | Peak ID | Ret Time | Height     | Area         | Conc.    |
|--------------|---------|----------|------------|--------------|----------|
| 1            |         | 37.673   | 163888.156 | 7968155.500  | 49.9028  |
| 2            |         | 40.173   | 167311.484 | 7999200.000  | 50.0972  |
| <b>Total</b> |         |          | 331199.641 | 15967355.500 | 100.0000 |

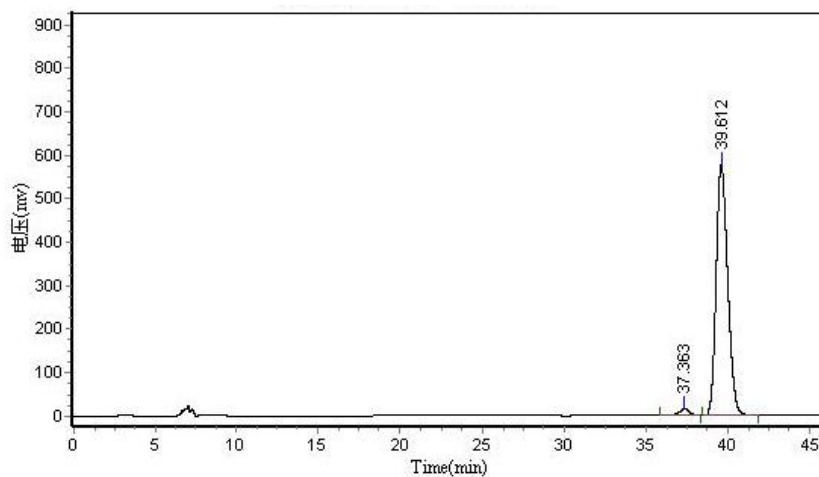

**Results**

| Peak No.     | Peak ID | Ret Time | Height     | Area         | Conc.    |
|--------------|---------|----------|------------|--------------|----------|
| 1            |         | 37.363   | 14115.769  | 641547.938   | 2.2055   |
| 2            |         | 39.612   | 576989.188 | 28447320.000 | 97.7945  |
| <b>Total</b> |         |          | 591104.956 | 29088867.938 | 100.0000 |



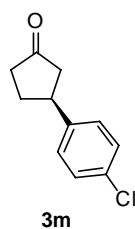

$^1\text{H NMR}$  (300 MHz,  $\text{CDCl}_3$ ):  $\delta$  1.88-2.02 (m, 1H), 2.24-2.51 (m, 4H), 2.66 (dd,  $J = 18.0, 7.5$  Hz, 1H), 3.34-3.45 (m, 1H), 7.19 (d,  $J = 8.7$  Hz, 2H), 7.31 (d,  $J = 8.4$  Hz, 2H).

HPLC: Chiralcel OZ-H Column (250 mm); detected at 214 nm; *n*-hexane / *i*-propanol = 90/10; flow = 0.8 mL/min; Retention time: 14.0 min, 15.8 min (maj).

Ref: Feng, C.-G.; Wang, Z.-Q.; Tian, P.; Xu, M.-H.; Lin, G.-Q. *Chem. Asian J.* **2008**, *3*, 1511.

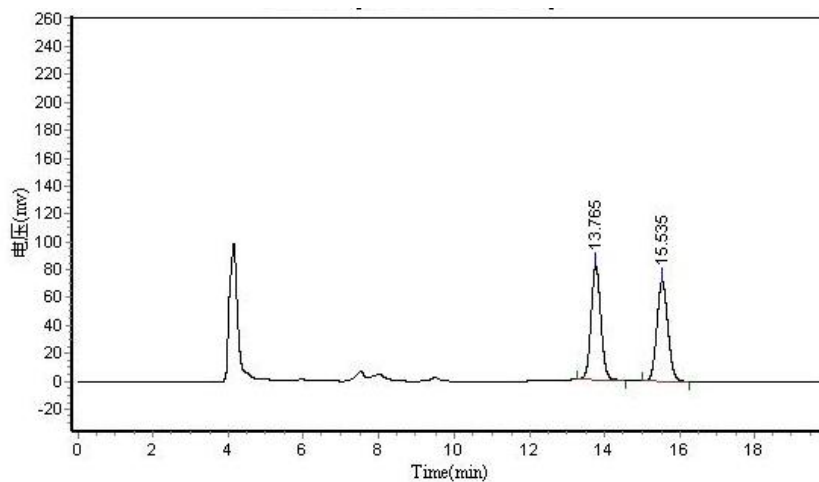

#### Results

| Peak No.     | Peak ID | Ret Time | Height     | Area        | Conc.    |
|--------------|---------|----------|------------|-------------|----------|
| 1            |         | 13.765   | 81739.070  | 1477601.375 | 50.2198  |
| 2            |         | 15.535   | 71823.234  | 1464669.750 | 49.7802  |
| <b>Total</b> |         |          | 153562.305 | 2942271.125 | 100.0000 |

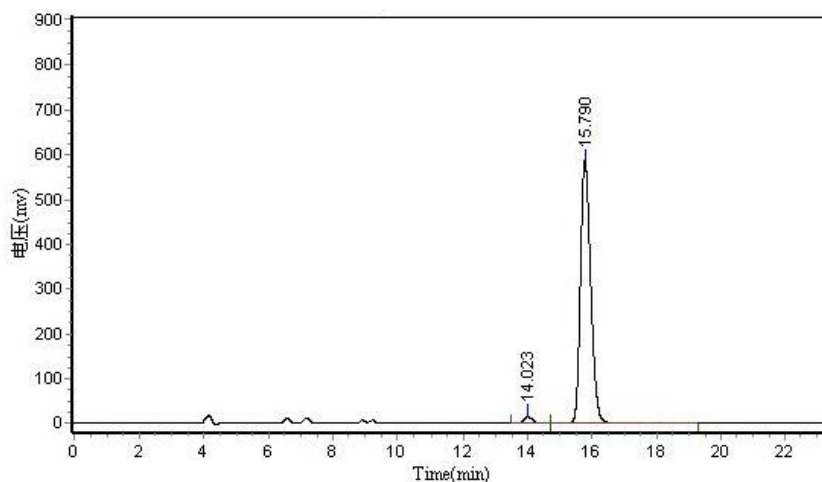

#### Results

| Peak No.     | Peak ID | Ret Time | Height     | Area         | Conc.    |
|--------------|---------|----------|------------|--------------|----------|
| 1            |         | 14.023   | 14759.937  | 279404.594   | 2.0989   |
| 2            |         | 15.790   | 586391.375 | 13032714.000 | 97.9011  |
| <b>Total</b> |         |          | 601151.312 | 13312118.594 | 100.0000 |

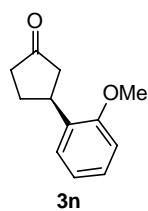

$^1\text{H NMR}$  (300 MHz,  $\text{CDCl}_3$ ):  $\delta$  2.00-2.11 (m, 1H), 2.23-2.48 (m, 4H), 2.64 (dd,  $J = 18.0, 7.5$  Hz, 1H), 3.63-3.74 (m, 1H), 3.84 (s, 3H), 6.88-6.97 (m, 2H), 7.17-7.26 (m, 2H).

HPLC: Chiralcel OZ-H Column (250 mm); detected at 214 nm; *n*-hexane / *i*-propanol = 99/1; flow = 0.7 mL/min; Retention time: 10.6 min, 12.4 min (maj).

Ref: Yelb, Q.; Grunewald, G. L. *J. Med. Chem.* **1989**, *32*, 478.

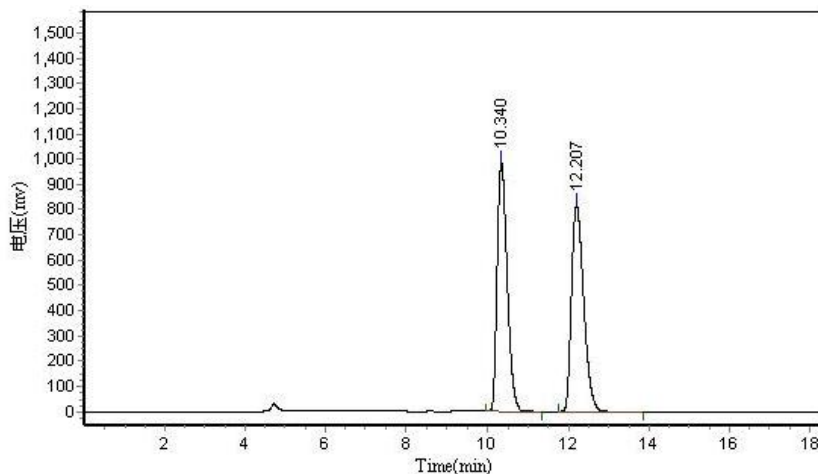

Results

| Peak No.     | Peak ID | Ret Time | Height      | Area         | Conc.    |
|--------------|---------|----------|-------------|--------------|----------|
| 1            |         | 10.340   | 984275.938  | 17040330.000 | 49.7884  |
| 2            |         | 12.207   | 816781.125  | 17185192.000 | 50.2116  |
| <b>Total</b> |         |          | 1801057.063 | 34225522.000 | 100.0000 |

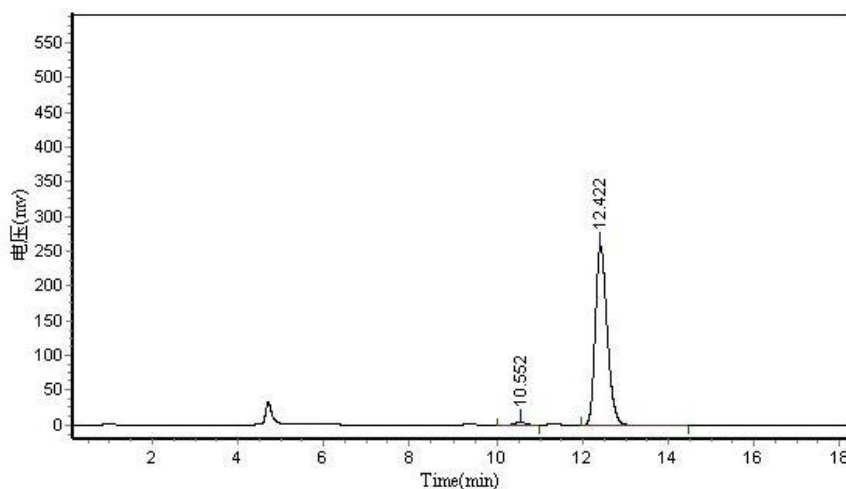

Results

| Peak No.     | Peak ID | Ret Time | Height     | Area        | Conc.    |
|--------------|---------|----------|------------|-------------|----------|
| 1            |         | 10.552   | 4394.226   | 72993.188   | 1.4469   |
| 2            |         | 12.422   | 258378.578 | 4971777.000 | 98.5531  |
| <b>Total</b> |         |          | 262772.804 | 5044770.188 | 100.0000 |

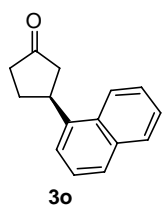

$^1\text{H NMR}$  (300 MHz,  $\text{CDCl}_3$ ):  $\delta$  2.10-2.23 (m, 1H), 2.31-2.59 (m, 4H), 2.80 (dd,  $J = 18.0, 7.2$  Hz, 1H), 4.15-4.25 (m, 1H), 7.35 (d,  $J = 6.9$  Hz, 1H), 7.42-7.58 (m, 3H), 7.76 (d,  $J = 7.8$  Hz, 1H), 7.88 (d,  $J = 7.8$  Hz, 1H), 8.09 (d,  $J = 8.4$  Hz, 1H).

HPLC: Chiralcel OZ-H Column (250 mm); detected at 214 nm; *n*-hexane / *i*-propanol = 90/10; flow = 0.8 mL/min; Retention time: 12.2 min, 13.5 min

(maj).

Ref: Feng, C.-G.; Wang, Z.-Q.; Tian, P.; Xu, M.-H.; Lin, G.-Q. *Chem. Asian J.* **2008**, *3*, 1511.

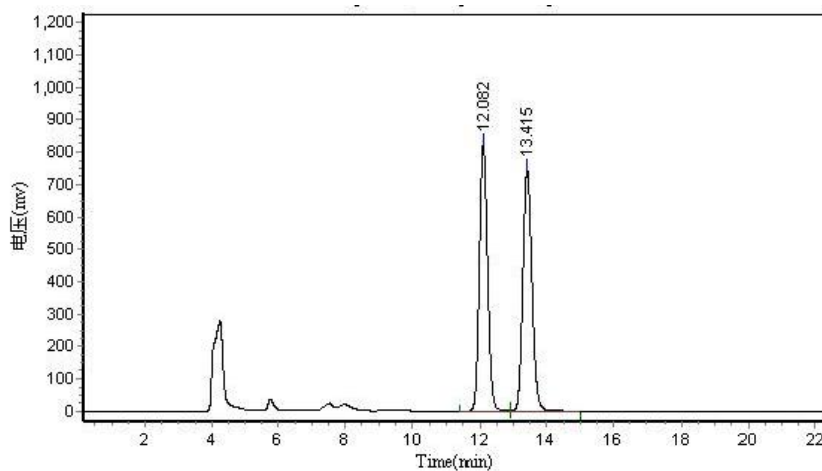

#### Results

| Peak No.     | Peak ID | Ret Time | Height      | Area         | Conc.    |
|--------------|---------|----------|-------------|--------------|----------|
| 1            |         | 12.082   | 819691.438  | 14235402.000 | 49.7535  |
| 2            |         | 13.415   | 743597.813  | 14376469.000 | 50.2465  |
| <b>Total</b> |         |          | 1563289.250 | 28611871.000 | 100.0000 |

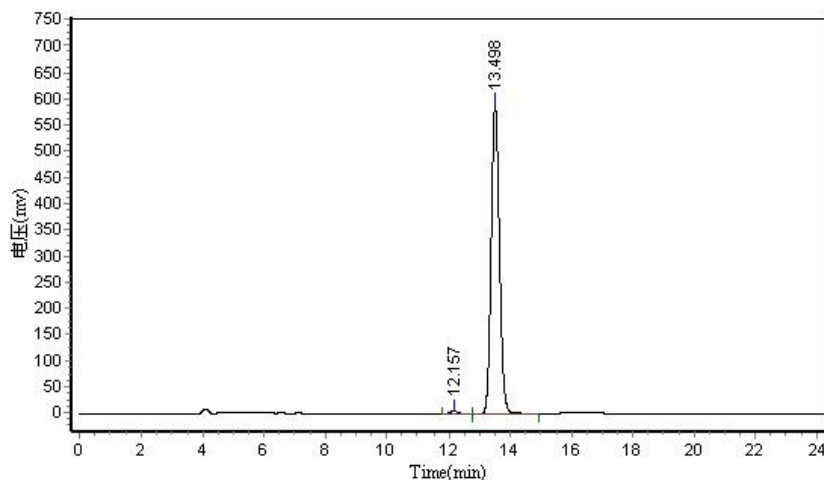

#### Results

| Peak No.     | Peak ID | Ret Time | Height     | Area         | Conc.    |
|--------------|---------|----------|------------|--------------|----------|
| 1            |         | 12.157   | 6026.279   | 98504.047    | 0.8873   |
| 2            |         | 13.498   | 588155.063 | 11003387.000 | 99.1127  |
| <b>Total</b> |         |          | 594181.342 | 11101891.047 | 100.0000 |

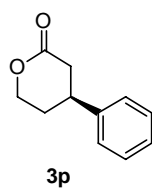

$^1\text{H}$  NMR (300 MHz,  $\text{CDCl}_3$ ):  $\delta$  1.97-2.10 (m, 1H), 2.15-2.21 (m, 1H), 2.63 (dd,  $J = 17.7, 10.8$  Hz, 1H), 2.92 (dd,  $J = 17.7, 5.7$  Hz, 1H), 3.19-3.29 (m, 1H), 4.35-4.43 (m, 1H), 4.48-4.54 (m, 1H), 7.20-7.39 (m, 5H).

HPLC: Chiralpak AS-H Column (250 mm); detected at 214 nm; *n*-hexane / *i*-propanol = 60/40; flow = 0.7 mL/min; Retention time: 27.9 min, 32.1 min (maj).

Ref: Boiteau, J.; Imbos, R.; Minnaard, A.; Feringa, B. *Org. Lett.*, **2003**, 5, 681.

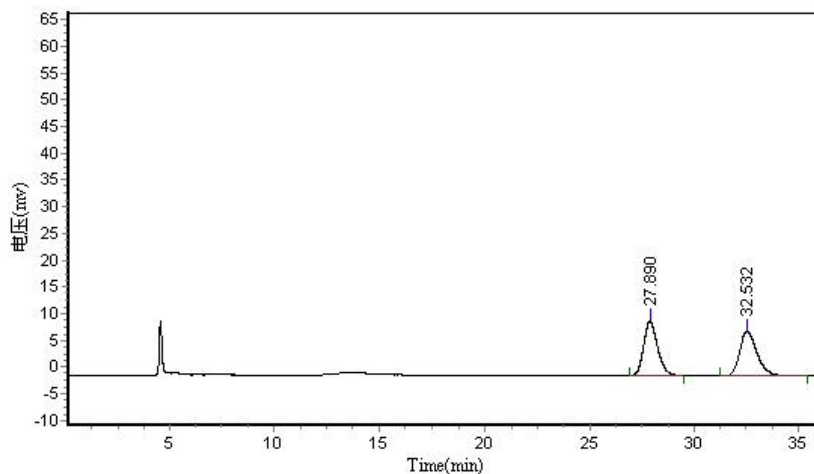

#### Results

| Peak No.     | Peak ID | Ret Time | Height    | Area       | Conc.    |
|--------------|---------|----------|-----------|------------|----------|
| 1            |         | 27.890   | 10121.000 | 467127.906 | 49.3439  |
| 2            |         | 32.532   | 8297.507  | 479549.625 | 50.6561  |
| <b>Total</b> |         |          | 18418.507 | 946677.531 | 100.0000 |

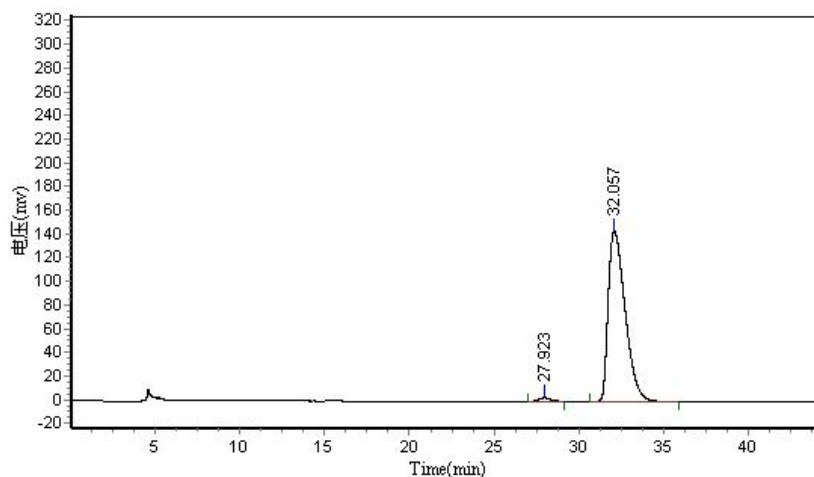

#### Results

| Peak No.     | Peak ID | Ret Time | Height     | Area         | Conc.    |
|--------------|---------|----------|------------|--------------|----------|
| 1            |         | 27.923   | 2991.538   | 136785.297   | 1.3569   |
| 2            |         | 32.057   | 143439.203 | 9944130.000  | 98.6431  |
| <b>Total</b> |         |          | 146430.741 | 10080915.297 | 100.0000 |

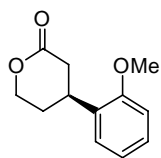

3q

$^1\text{H NMR}$  (300 MHz,  $\text{CDCl}_3$ ):  $\delta$  2.05-2.13 (m, 1H), 2.64 (dd,  $J = 14.4, 9.9$  Hz, 1H), 2.91 (dd,  $J = 14.4, 6.3$  Hz, 1H), 3.49-3.59 (m, 1H), 3.84 (s, 3H), 4.33-4.52 (m, 2H), 6.88-6.98 (m, 2H), 7.12 (d,  $J = 7.5$  Hz, 1H), 7.23-7.28 (m, 1H).

HPLC: Chiralpak AS-H Column (250 mm); detected at 214 nm; *n*-hexane / *i*-propanol = 60/40; flow = 0.7 mL/min; Retention time: 22.9 min, 40.2 min (maj).

Ref: Jin, S.-S.; Wang, H.; Xu, M.-H. *Chem. Common*, **2011**, 47, 7230.

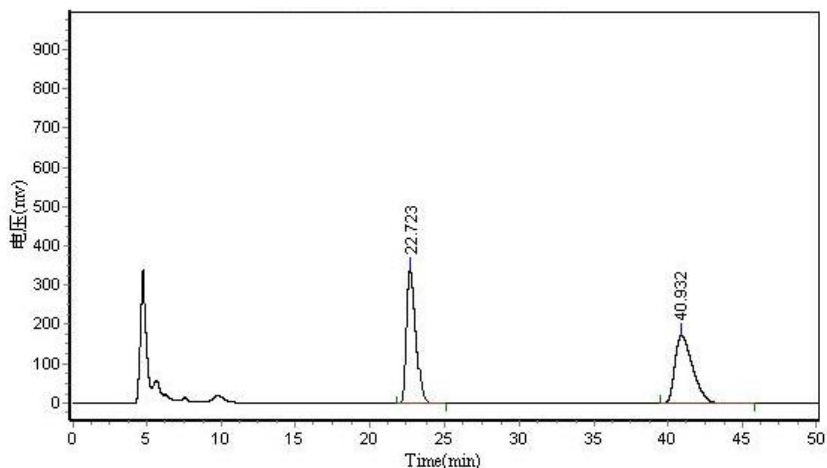

Results

| Peak No.     | Peak ID | Ret Time | Height     | Area         | Conc.    |
|--------------|---------|----------|------------|--------------|----------|
| 1            |         | 22.723   | 339878.156 | 14363554.000 | 49.8841  |
| 2            |         | 40.932   | 172196.016 | 14430269.000 | 50.1158  |
| <b>Total</b> |         |          | 512074.172 | 28793823.000 | 100.0000 |

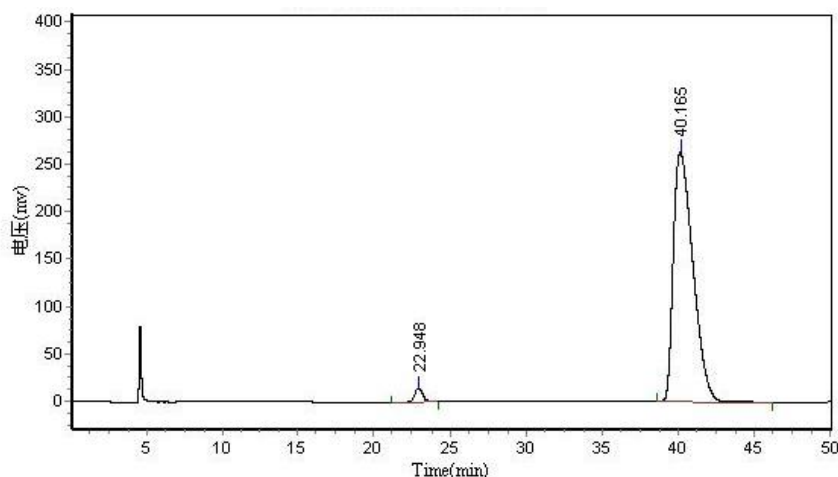

Results

| Peak No.     | Peak ID | Ret Time | Height     | Area         | Conc.    |
|--------------|---------|----------|------------|--------------|----------|
| 1            |         | 22.948   | 15013.800  | 546834.875   | 2.2484   |
| 2            |         | 40.165   | 263545.156 | 23773702.000 | 97.7516  |
| <b>Total</b> |         |          | 278558.956 | 24320536.875 | 100.0000 |

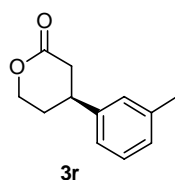

$^1\text{H NMR}$  (300 MHz,  $\text{CDCl}_3$ ):  $\delta$  1.96-2.09 (m, 1H), 2.12-2.20 (m, 1H), 2.36 (s, 3H), 2.63 (dd,  $J = 17.7, 10.8$  Hz, 1H), 2.90 (dd,  $J = 18.0, 6.0$  Hz, 1H), 3.15-3.25 (m, 1H), 4.34-4.42 (m, 1H), 4.47-4.54 (m, 1H), 7.00-7.02 (m, 2H), 7.08-7.10 (d,  $J = 7.8$  Hz, 1H), 7.22-7.27 (m, 1H).

HPLC: Chiralpak AS-H Column (250 mm); detected at 214 nm; *n*-hexane / *i*-propanol = 60/40; flow = 0.7 mL/min; Retention time: 21.7 min, 24.0 min (maj).

Ref: Bürgi, J. J.; Mariz, R.; Gatti, M.; Drinkel, E.; Luan, X.; Blumentritt, S.; Linden, A.; Dorta, R. *Angew. Chem. Int. Ed.* **2009**, *48*, 2768.

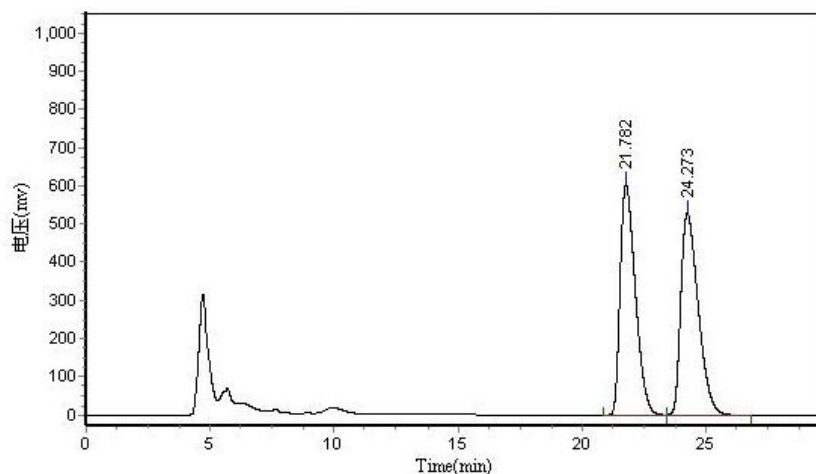

#### Results

| Peak No.     | Peak ID | Ret Time | Height      | Area         | Conc.    |
|--------------|---------|----------|-------------|--------------|----------|
| 1            |         | 21.782   | 603203.188  | 25727878.000 | 49.8811  |
| 2            |         | 24.273   | 529131.063  | 25850572.000 | 50.1189  |
| <b>Total</b> |         |          | 1132334.250 | 51578450.000 | 100.0000 |

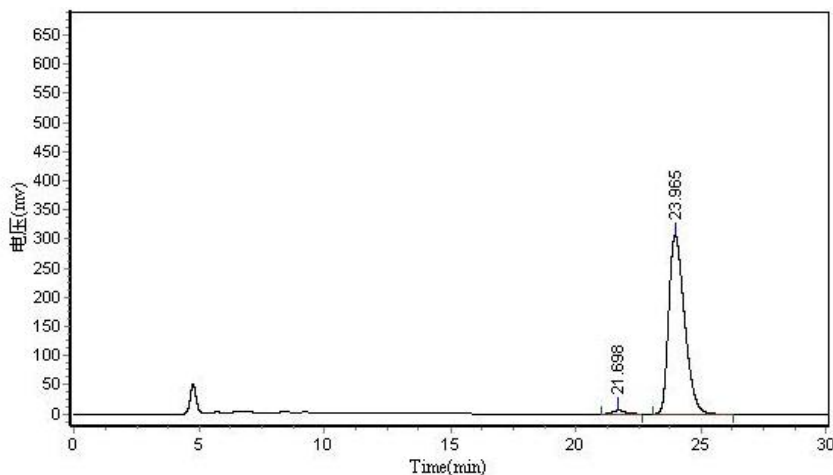

#### Results

| Peak No.     | Peak ID | Ret Time | Height     | Area         | Conc.    |
|--------------|---------|----------|------------|--------------|----------|
| 1            |         | 21.698   | 5937.079   | 206019.344   | 1.5079   |
| 2            |         | 23.965   | 306201.344 | 13456970.000 | 98.4921  |
| <b>Total</b> |         |          | 312138.422 | 13662989.344 | 100.0000 |

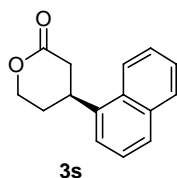

$^1\text{H NMR}$  (300 MHz,  $\text{CDCl}_3$ ):  $\delta$  2.10-2.23 (m, 1H), 2.30-2.36 (m, 1H), 2.76 (dd,  $J = 17.7, 9.9$  Hz, 1H), 3.08 (dd,  $J = 17.7, 6.0$  Hz, 1H), 4.02-4.12 (m, 1H), 4.46-4.50 (m, 2H), 7.00-7.02 (m, 2H), 7.33 (d,  $J = 7.2$  Hz, 1H), 7.45-7.58 (m, 3H), 7.78 (d,  $J = 8.1$  Hz, 1H), 7.89 (d,  $J = 7.5$  Hz, 1H), 8.00 (d,  $J = 8.1$  Hz, 1H).

HPLC: Chiralpak AS-H Column (250 mm); detected at 214 nm; *n*-hexane / *i*-propanol = 60/40; flow = 0.7 mL/min; Retention time: 23.4 min, 35.0 min (maj).

Ref: Gendrineau, T.; Chuzel, O.; Eijsberg, H.; Genet, J-P.; Darses, S. *Angew. Chem. Int. Ed.* **2008**, *47*, 7669.

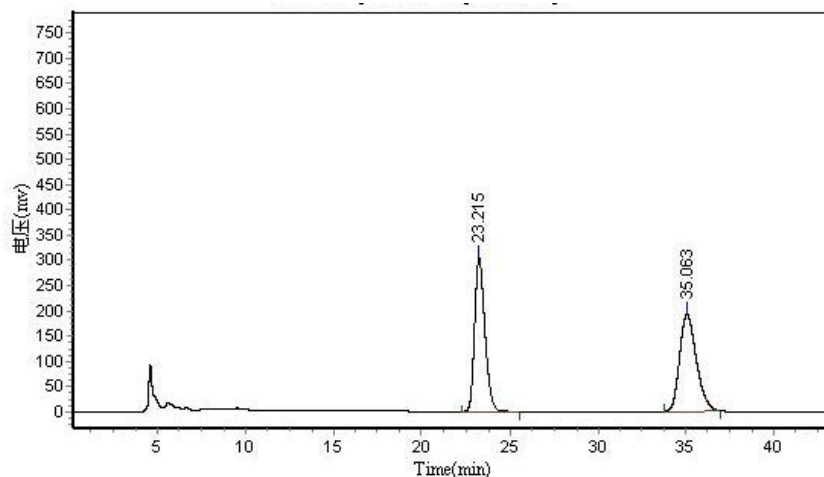

#### Results

| Peak No.     | Peak ID | Ret Time | Height     | Area         | Conc.    |
|--------------|---------|----------|------------|--------------|----------|
| 1            |         | 23.215   | 303003.219 | 12386152.000 | 49.3491  |
| 2            |         | 35.063   | 192336.625 | 12712914.000 | 50.6509  |
| <b>Total</b> |         |          | 495339.844 | 25099066.000 | 100.0000 |

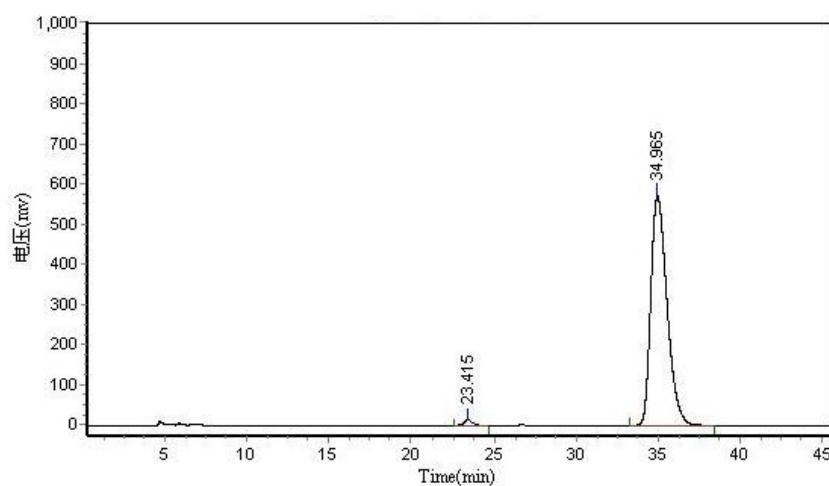

#### Results

| Peak No.     | Peak ID | Ret Time | Height     | Area         | Conc.    |
|--------------|---------|----------|------------|--------------|----------|
| 1            |         | 23.415   | 14369.841  | 547620.938   | 1.3785   |
| 2            |         | 34.965   | 570955.188 | 39177276.000 | 98.6215  |
| <b>Total</b> |         |          | 585325.028 | 39724896.938 | 100.0000 |

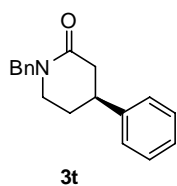

$^1\text{H NMR}$  (300 MHz,  $\text{CDCl}_3$ ):  $\delta$  1.85-2.09 (m, 2H), 2.59 (dd,  $J = 17.4, 10.8$  Hz, 1H), 2.82 (dd,  $J = 17.4, 4.8$  Hz, 1H), 3.05-3.12 (m, 1H), 3.27-3.35 (m, 2H), 4.55 (d,  $J = 15.0$  Hz, 1H), 4.74 (d,  $J = 14.7$  Hz, 1H), 7.17-7.33 (m, 10H).

HPLC: Chiralpak AD-H Column (250 mm); detected at 214 nm; *n*-hexane / *i*-propanol = 90/10; flow = 0.7 mL/min; Retention time: 21.0 min (maj), 22.7 min.

Ref: Senda, T. Ogasawara, M. Gayashi, T. *J. Org. Chem.* **2001**, *66*, 6852.

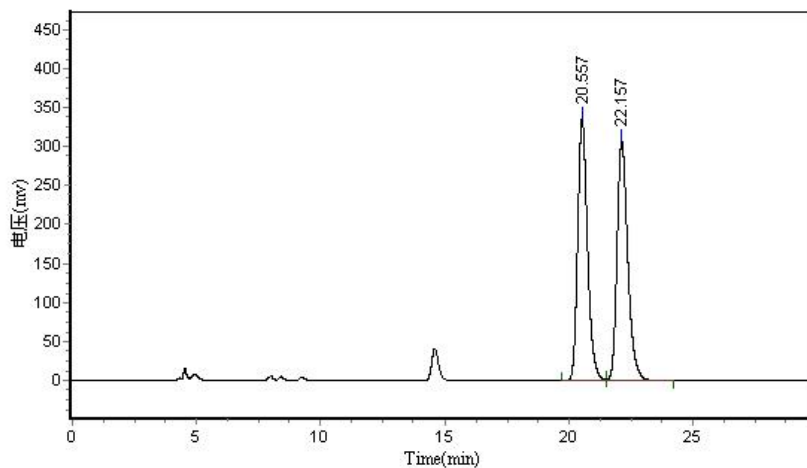

**Results**

| Peak No.     | Peak ID | Ret Time | Height     | Area         | Conc.    |
|--------------|---------|----------|------------|--------------|----------|
| 1            |         | 20.557   | 334979.313 | 9202285.000  | 50.0283  |
| 2            |         | 22.157   | 306399.969 | 9191888.000  | 49.9717  |
| <b>Total</b> |         |          | 641379.281 | 18394173.000 | 100.0000 |

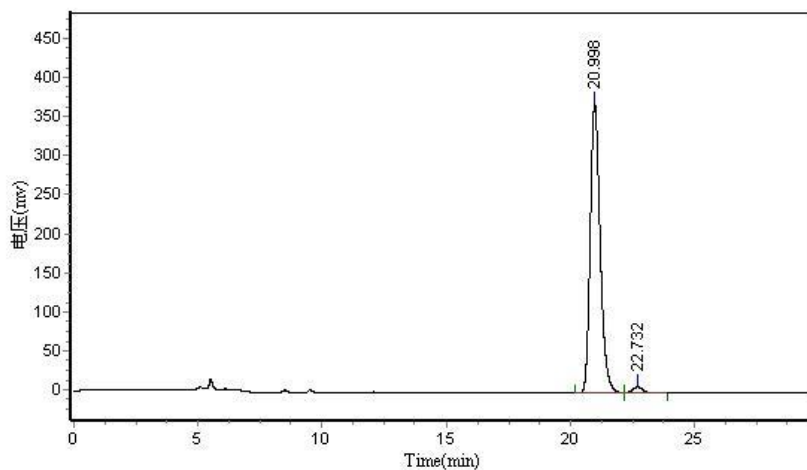

**Results**

| Peak No.     | Peak ID | Ret Time | Height     | Area         | Conc.    |
|--------------|---------|----------|------------|--------------|----------|
| 1            |         | 20.998   | 369601.469 | 10355180.000 | 97.7039  |
| 2            |         | 22.732   | 8081.784   | 243349.547   | 2.2961   |
| <b>Total</b> |         |          | 377683.253 | 10598529.547 | 100.0000 |



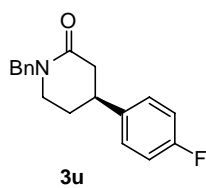

$^1\text{H NMR}$  (300 MHz,  $\text{CDCl}_3$ ):  $\delta$  1.83-2.08 (m, 2H), 2.54 (dd,  $J = 17.7, 11.1$  Hz, 1H), 2.80 (dd,  $J = 17.1, 4.8$  Hz, 1H), 3.05-3.13 (m, 1H), 3.27-3.31 (m, 2H), 4.55 (d,  $J = 15.0$  Hz, 1H), 4.74 (d,  $J = 14.7$  Hz, 1H), 7.00 (t,  $J = 8.4$  Hz, 2H), 7.13-7.17 (m, 2H), 7.27-7.36 (m, 5H).

HPLC: Chiralpak AD-H Column (250 mm); detected at 214 nm; *n*-hexane / *i*-propanol = 90/10; flow = 0.7 mL/min; Retention time: 22.5 min (maj), 23.7 min.

Ref: Senda, T. Ogasawara, M. Gayashi, T. *J. Org. Chem.* **2001**, *66*, 6852.

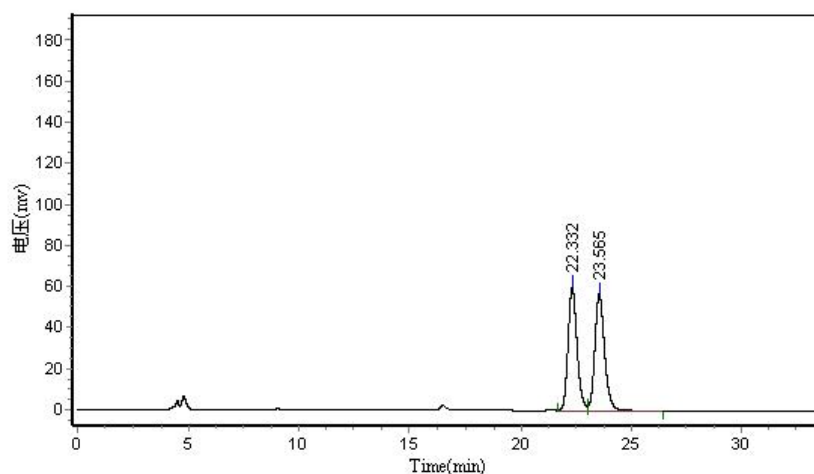

Results

| Peak No.     | Peak ID | Ret Time | Height     | Area        | Conc.    |
|--------------|---------|----------|------------|-------------|----------|
| 1            |         | 22.332   | 60270.293  | 1712624.375 | 49.1633  |
| 2            |         | 23.565   | 56922.777  | 1770919.625 | 50.8367  |
| <b>Total</b> |         |          | 117193.070 | 3483544.000 | 100.0000 |

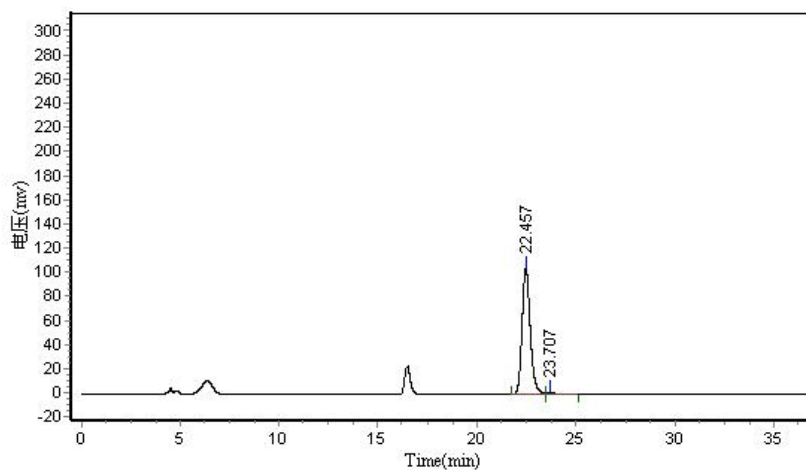

Results

| Peak No.     | Peak ID | Ret Time | Height     | Area        | Conc.    |
|--------------|---------|----------|------------|-------------|----------|
| 1            |         | 22.457   | 104505.273 | 3043873.500 | 98.3001  |
| 2            |         | 23.707   | 1331.457   | 52636.516   | 1.6999   |
| <b>Total</b> |         |          | 105836.730 | 3096510.016 | 100.0000 |

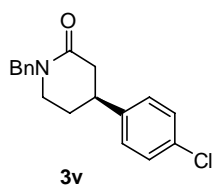

$^1\text{H}$  NMR (300 MHz,  $\text{CDCl}_3$ ):  $\delta$  1.84-2.07 (m, 2H), 2.53 (dd,  $J = 17.4$ , 11.1 Hz, 1H), 2.79 (dd,  $J = 17.4$ , 5.4 Hz, 1H), 3.03-3.13 (m, 1H), 3.23-3.33 (m, 2H), 4.54 (d,  $J = 14.7$  Hz, 1H), 4.73 (d,  $J = 15.0$  Hz, 1H), 7.11 (d,  $J = 8.1$  Hz, 2H), 7.27-7.36 (m, 7H).

HPLC: Chiralcel OJ-H Column (250 mm); detected at 214 nm; *n*-hexane / *i*-propanol = 90/10; flow = 0.7 mL/min; Retention time: 22.9 min, 24.1 min (maj).

Ref: Senda, T. Ogasawara, M. Gayashi, T. *J. Org. Chem.* **2001**, *66*, 6852.

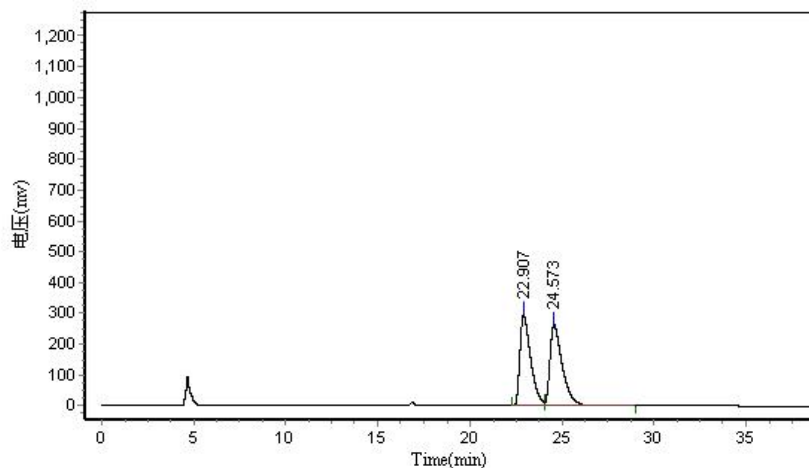

#### Results

| Peak No.     | Peak ID | Ret Time | Height     | Area         | Conc.    |
|--------------|---------|----------|------------|--------------|----------|
| 1            |         | 22.907   | 295153.563 | 12051471.000 | 49.3264  |
| 2            |         | 24.573   | 264422.188 | 12380626.000 | 50.6736  |
| <b>Total</b> |         |          | 559575.750 | 24432097.000 | 100.0000 |

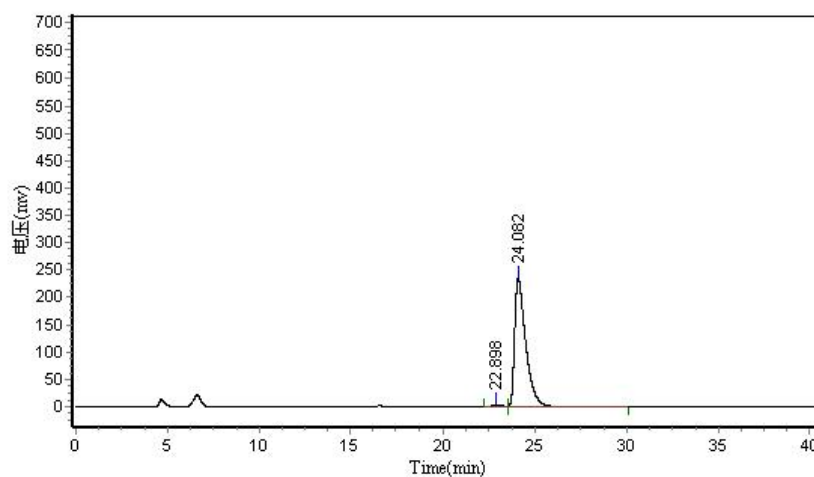

#### Results

| Peak No.     | Peak ID | Ret Time | Height     | Area         | Conc.    |
|--------------|---------|----------|------------|--------------|----------|
| 1            |         | 22.898   | 3690.359   | 126109.734   | 1.2565   |
| 2            |         | 24.082   | 234475.859 | 9910202.000  | 98.7435  |
| <b>Total</b> |         |          | 238166.219 | 10036311.734 | 100.0000 |

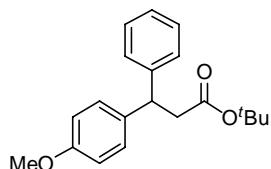

$^1\text{H}$  NMR (300 MHz,  $\text{CDCl}_3$ ):  $\delta$  1.27 (s, 9H), 2.93 (d,  $J = 8.1$  Hz, 2H), 3.76 (s, 3H), 4.43 (t,  $J = 8.1$  Hz, 1H), 6.81 (d,  $J = 8.4$  Hz, 2H), 7.14-7.29 (m, 7H).

HPLC: Chiralpak AD-H Column (250 mm); detected at 214 nm;  $n$ -hexane /  $i$ -propanol = 99/1; flow = 1.0 mL/min; Retention time:

12.8 min (maj), 15.2 min.

Ref: Paquin, J.-F.; Stephenson, C. R. J.; Defieber, C.; Carreira, E. M. *Org. Lett.* **2005**, *7*, 3821.

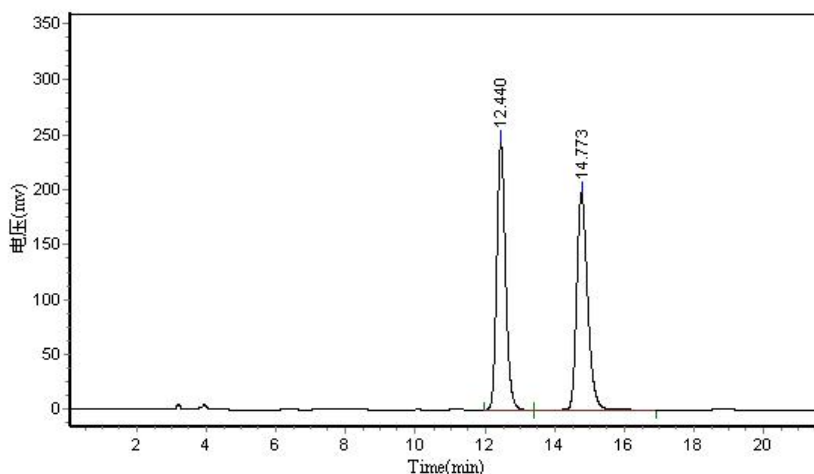

#### Results

| Peak No.     | Peak ID | Ret Time | Height     | Area        | Conc.    |
|--------------|---------|----------|------------|-------------|----------|
| 1            |         | 12.440   | 242398.125 | 4249242.000 | 49.8165  |
| 2            |         | 14.773   | 196375.469 | 4280554.000 | 50.1835  |
| <b>Total</b> |         |          | 438773.594 | 8529796.000 | 100.0000 |

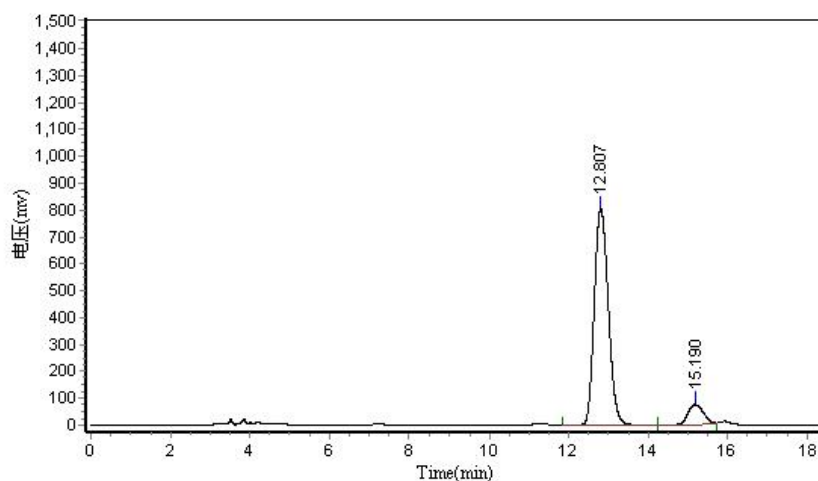

#### Results

| Peak No.     | Peak ID | Ret Time | Height     | Area         | Conc.    |
|--------------|---------|----------|------------|--------------|----------|
| 1            |         | 12.807   | 803266.188 | 19676904.000 | 90.1318  |
| 2            |         | 15.190   | 75416.281  | 2154347.750  | 9.8682   |
| <b>Total</b> |         |          | 878682.469 | 21831251.750 | 100.0000 |

## 6. Copies of $^1\text{H}$ and $^{13}\text{C}$ NMR for ligand compounds.

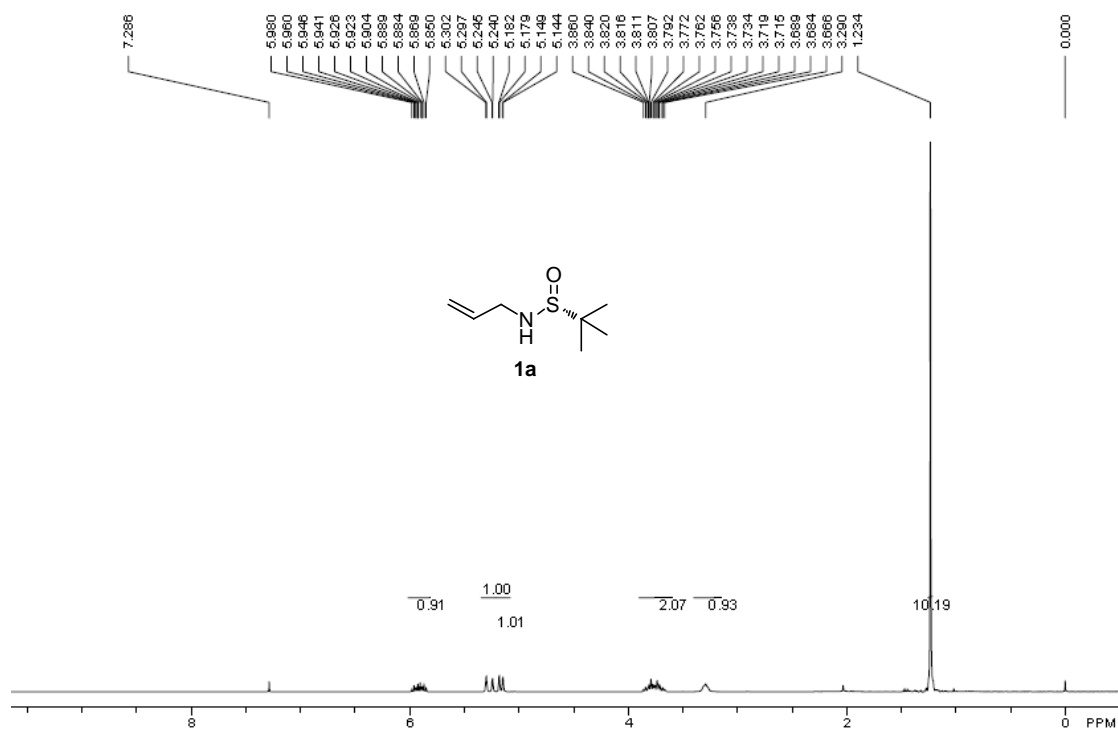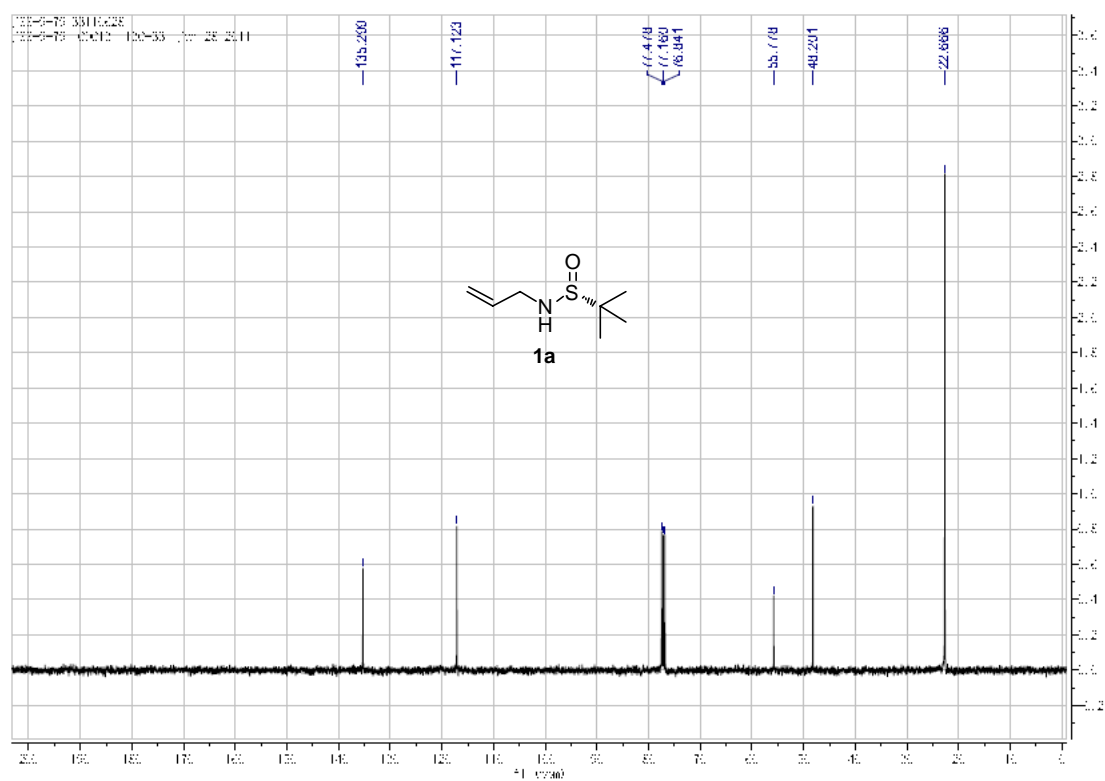

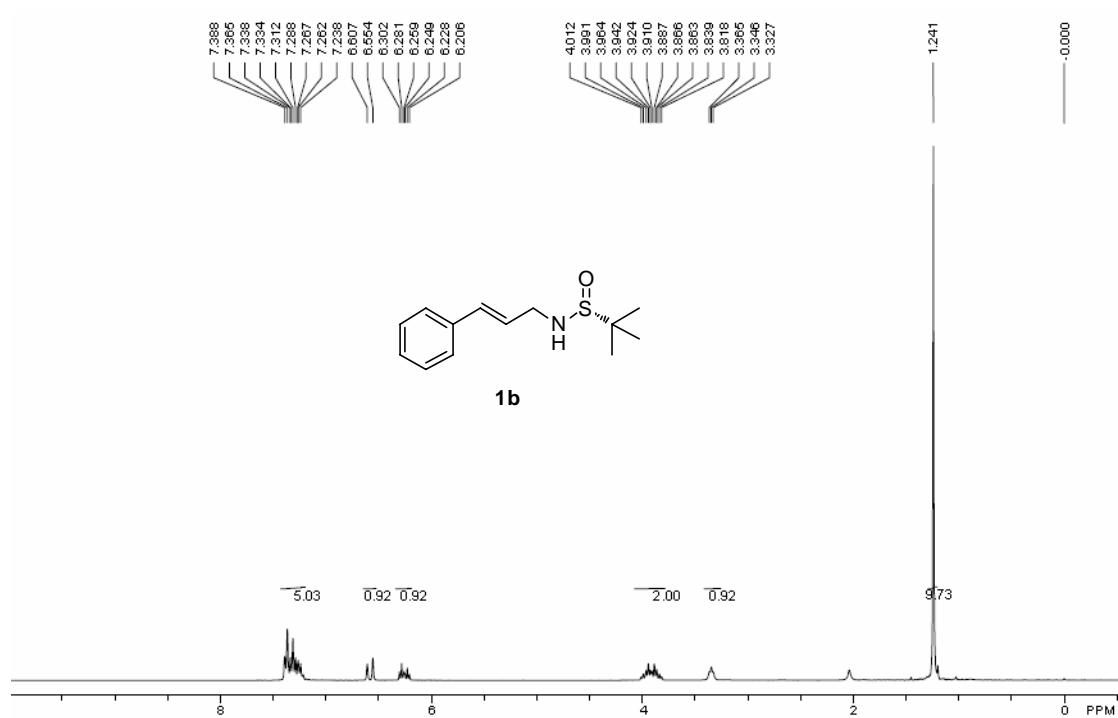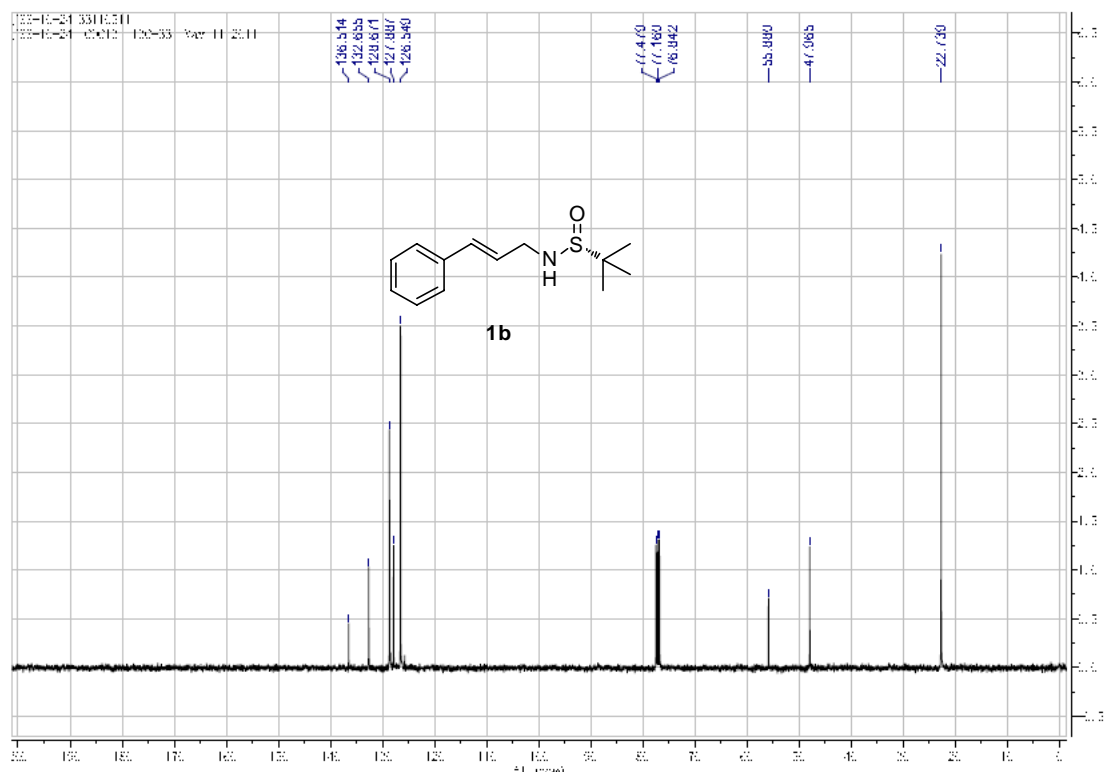

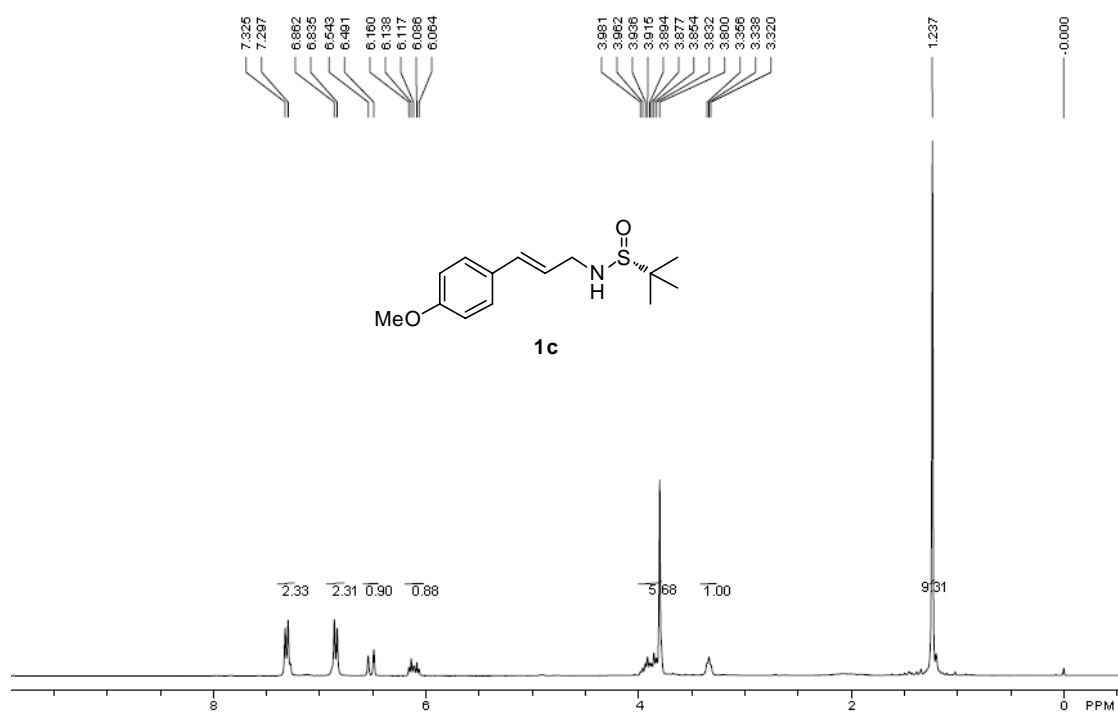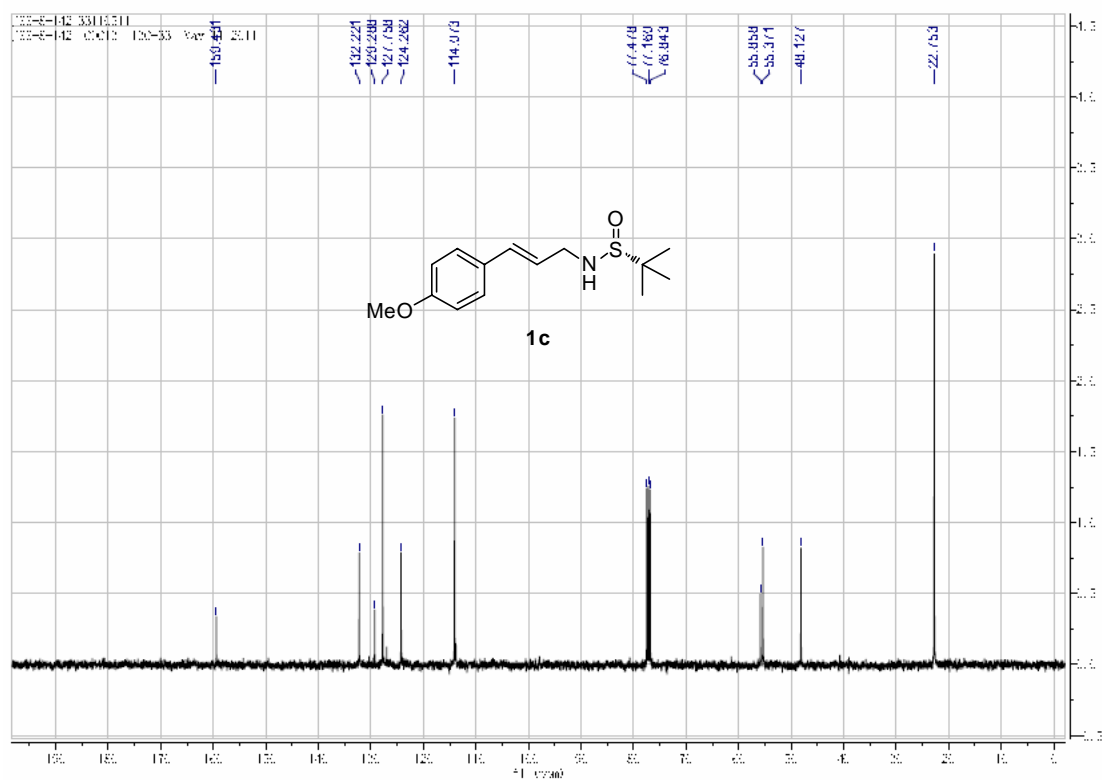

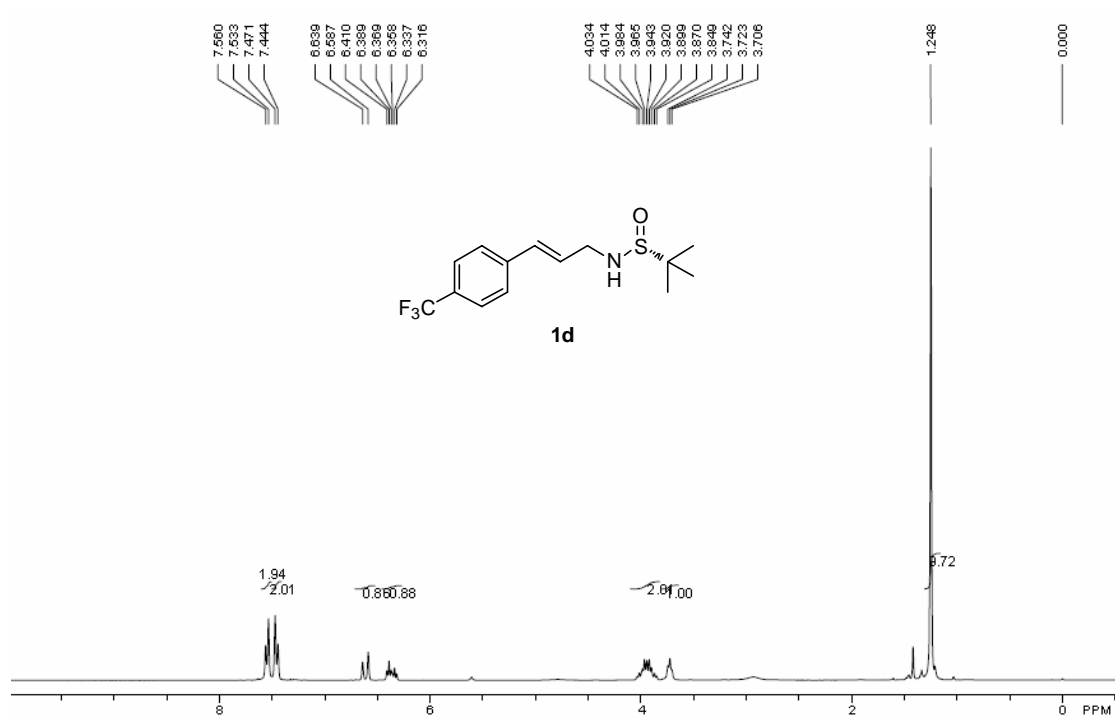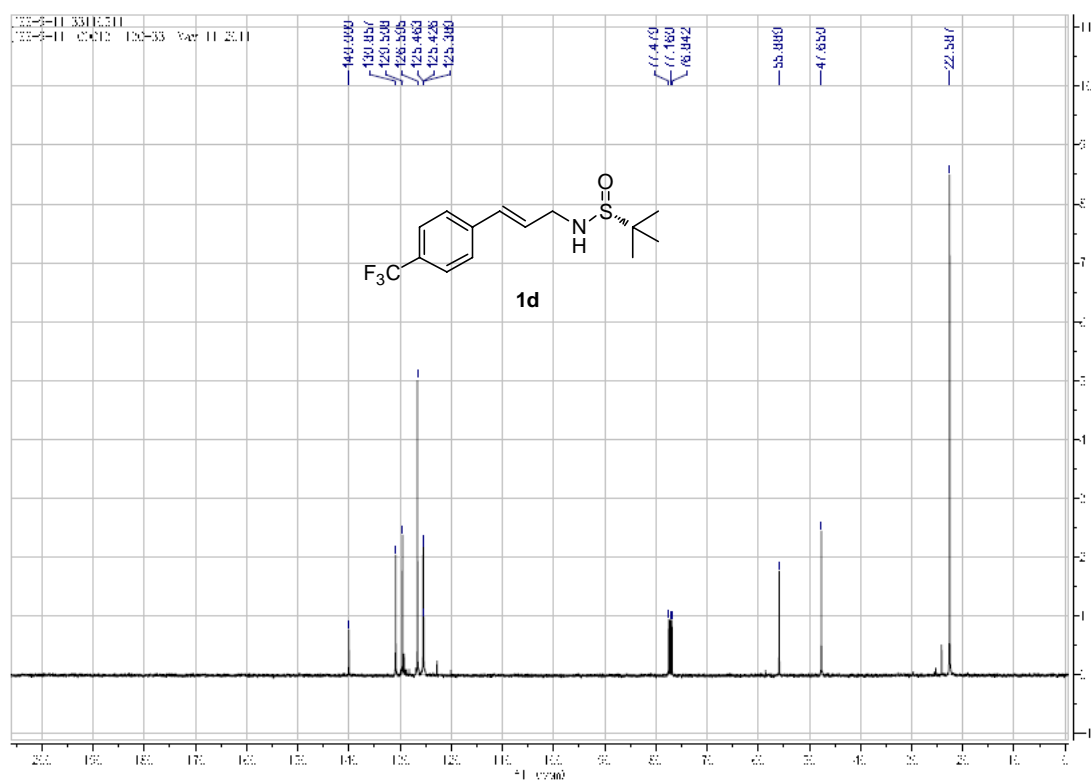

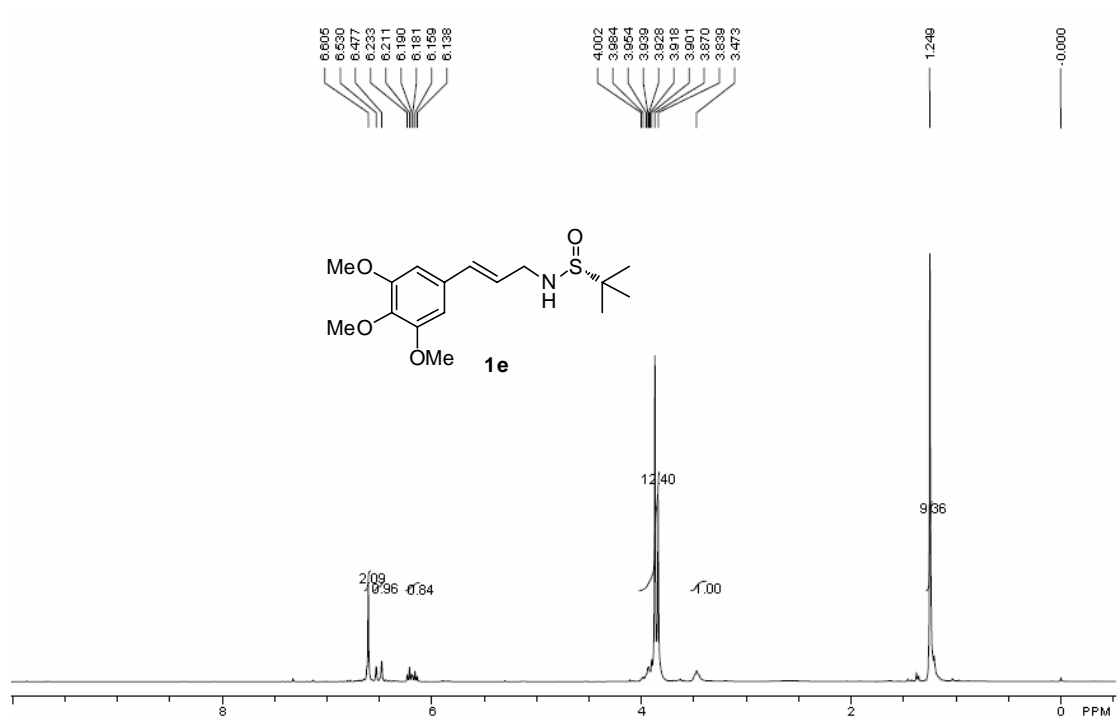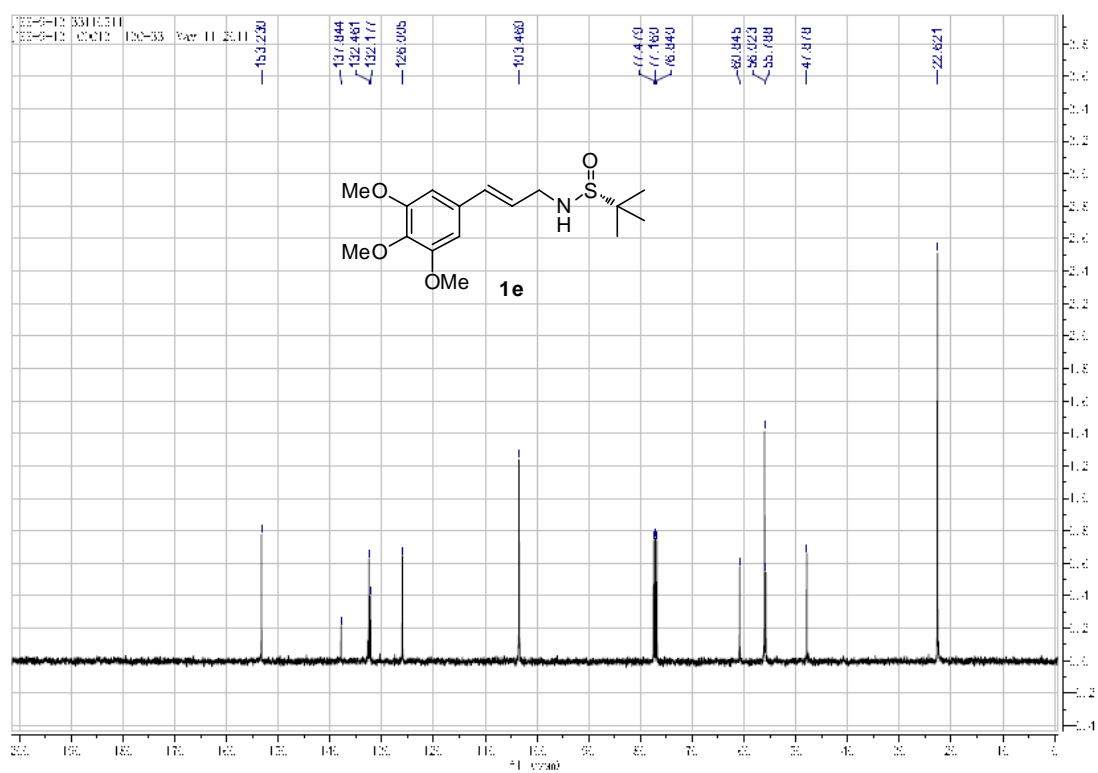



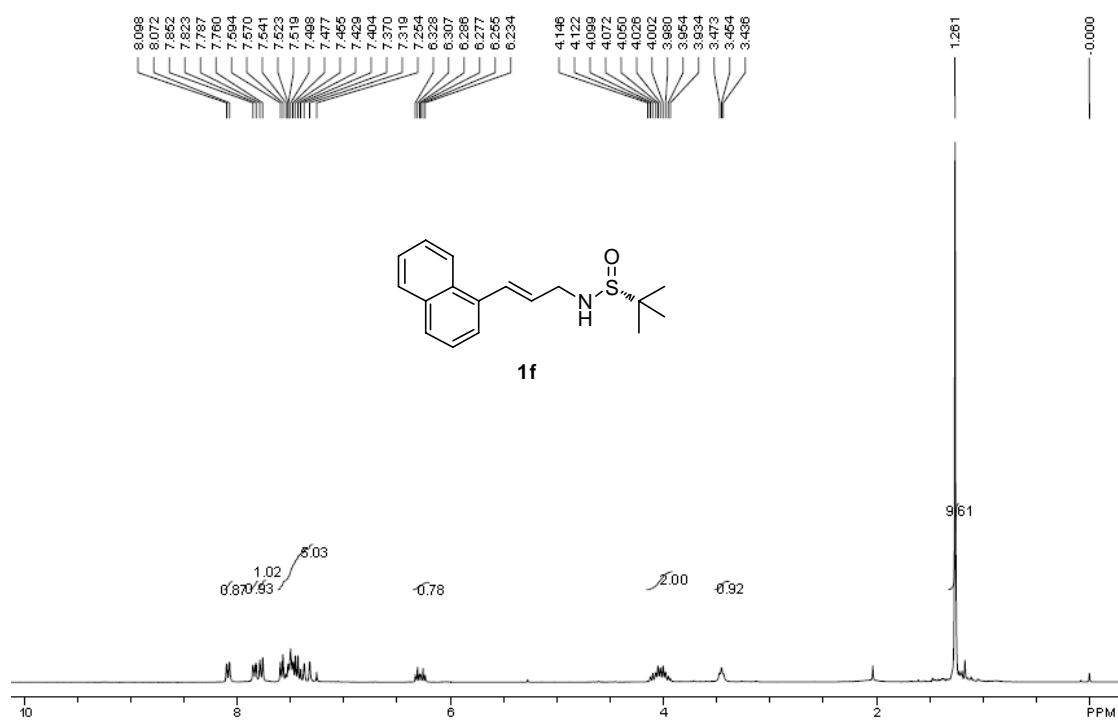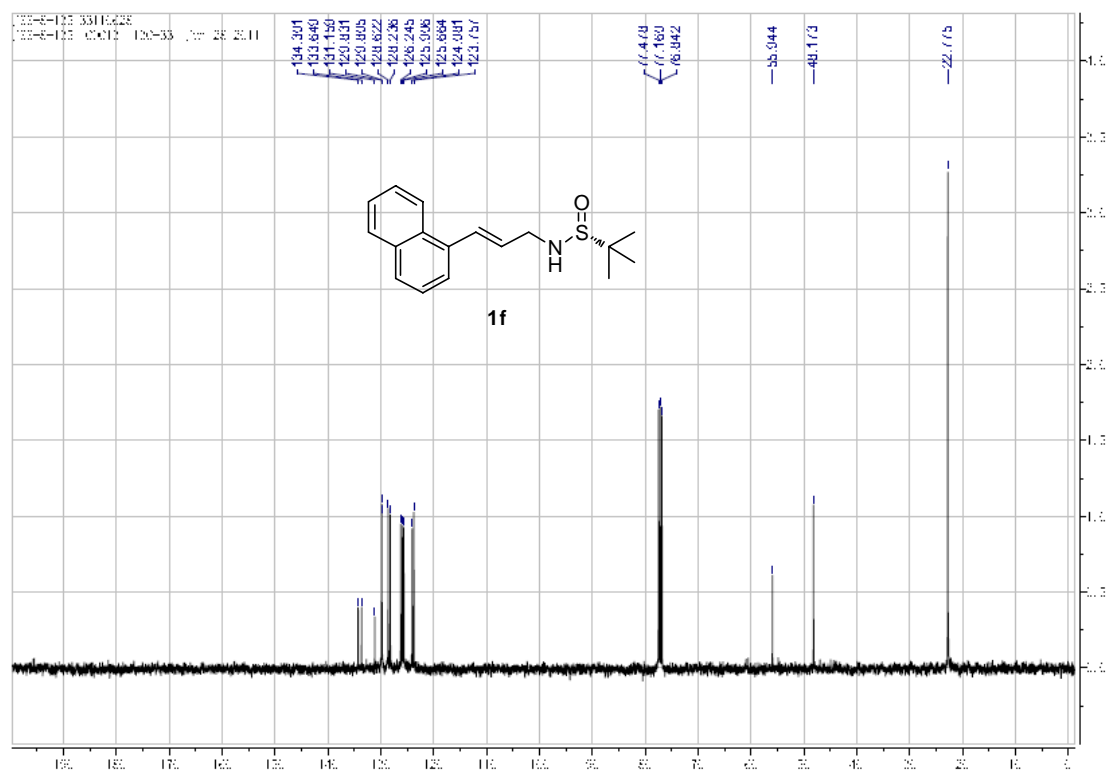

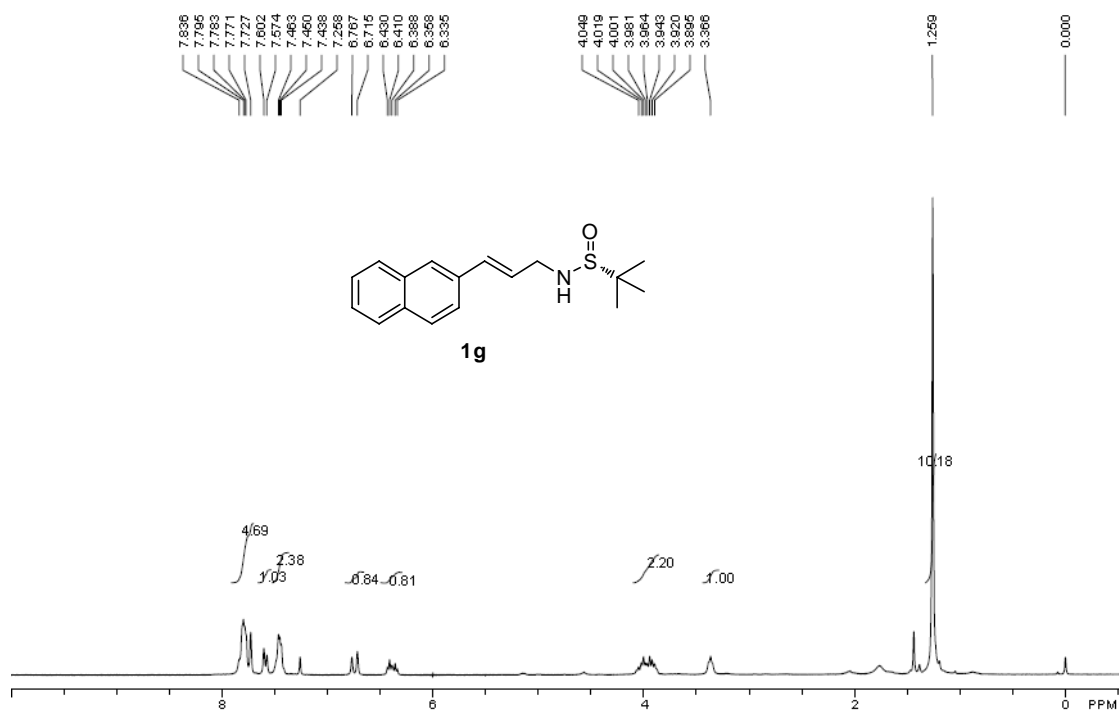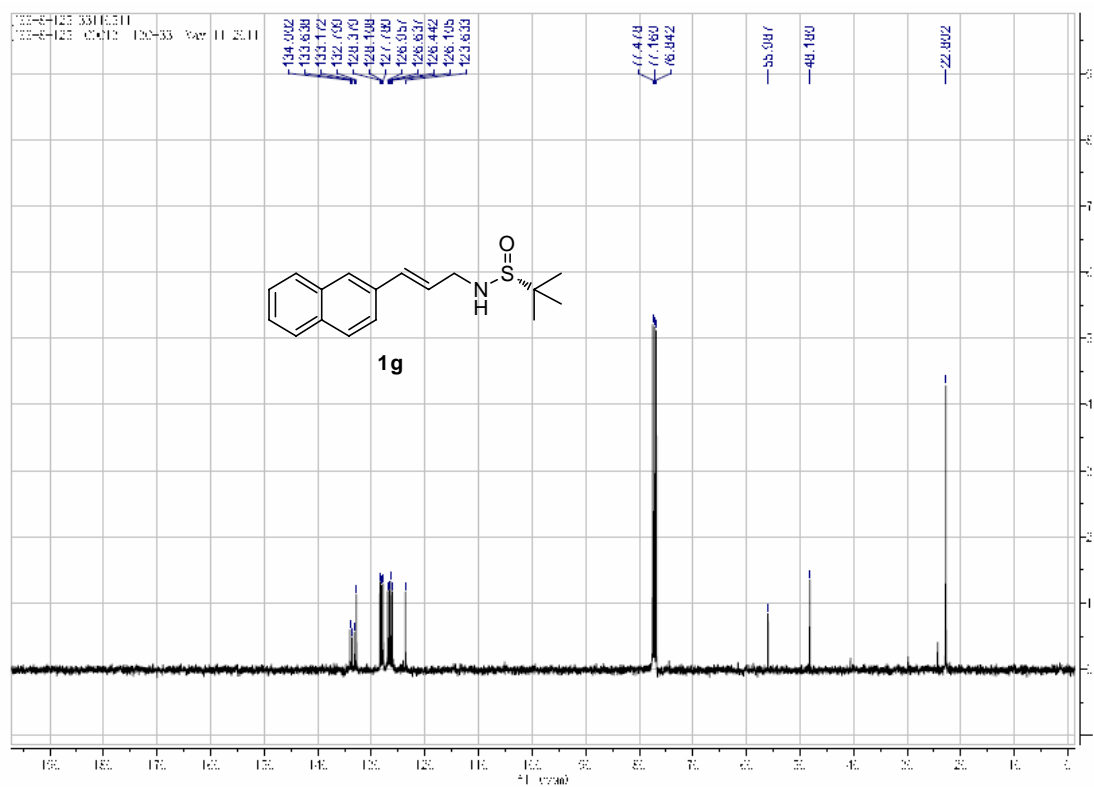

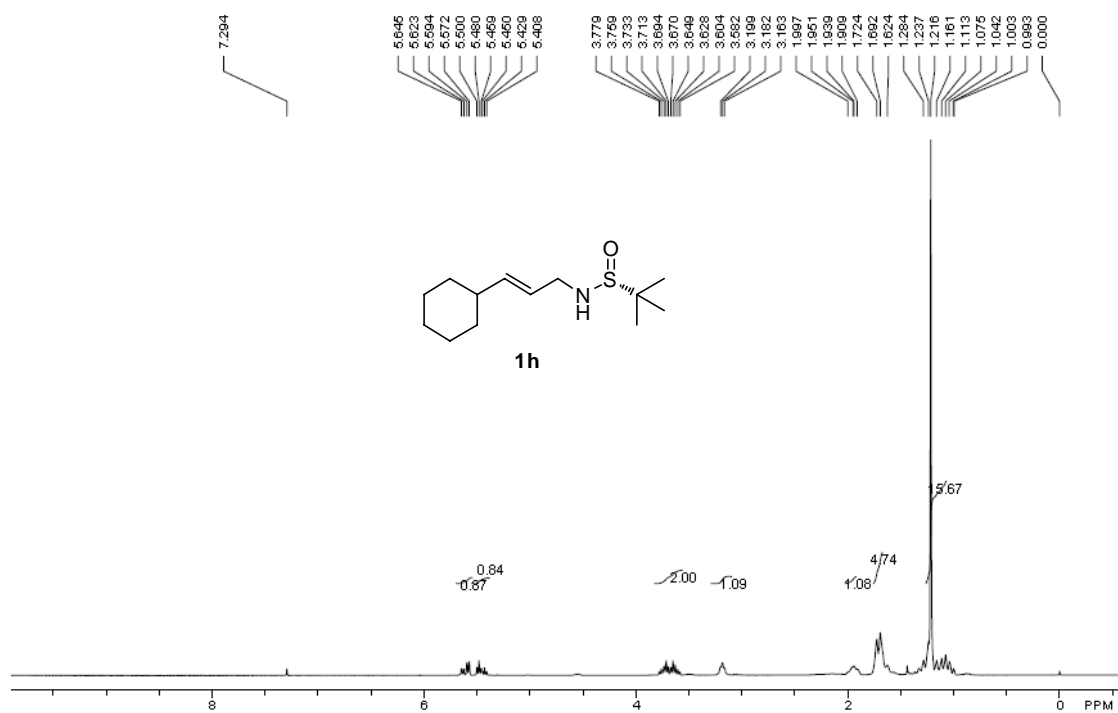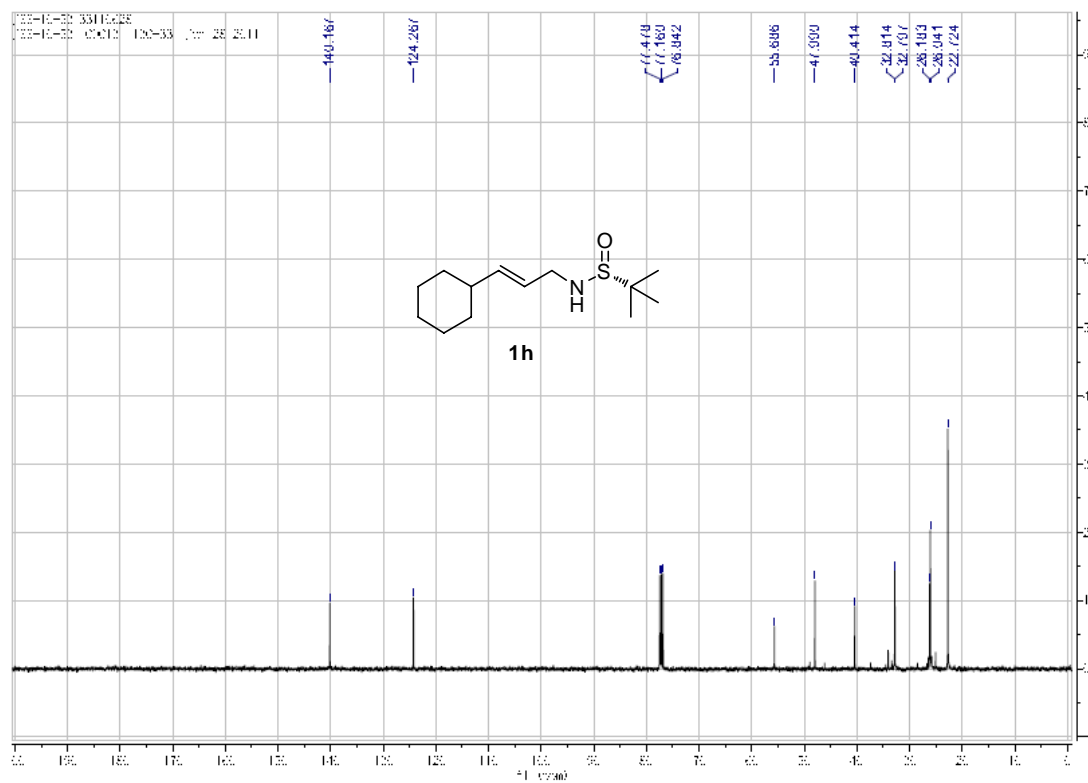

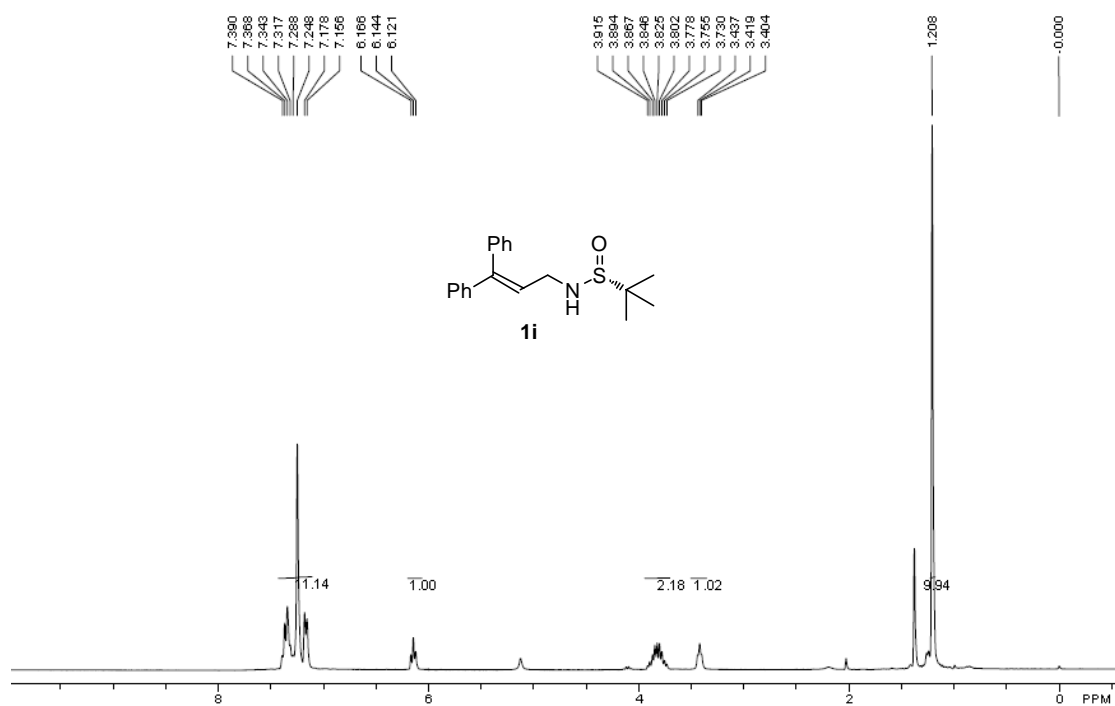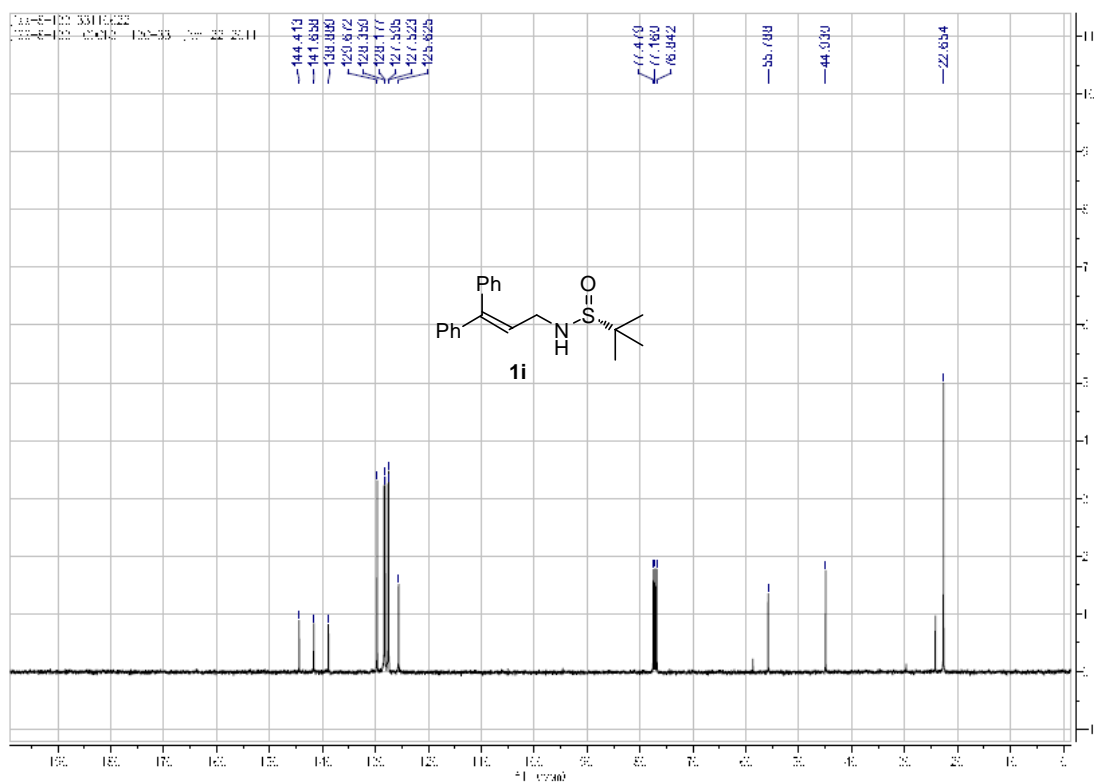

### 7. Copies of $^1\text{H}$ and $^{13}\text{C}$ NMR for ligand **1b**-Rh complex

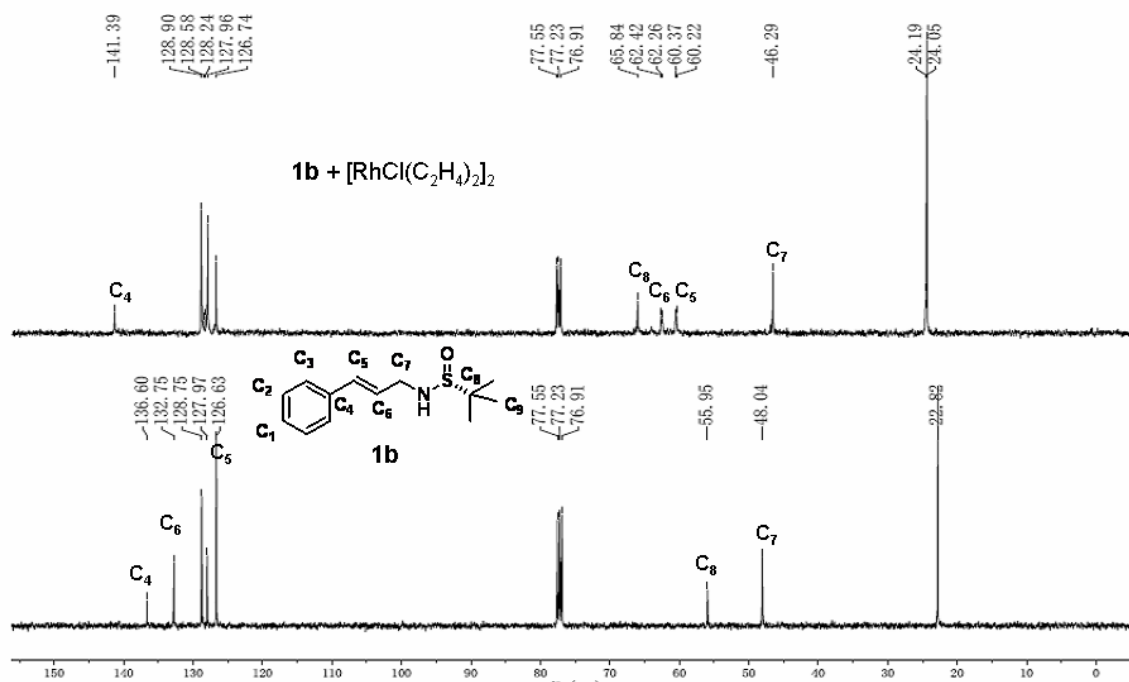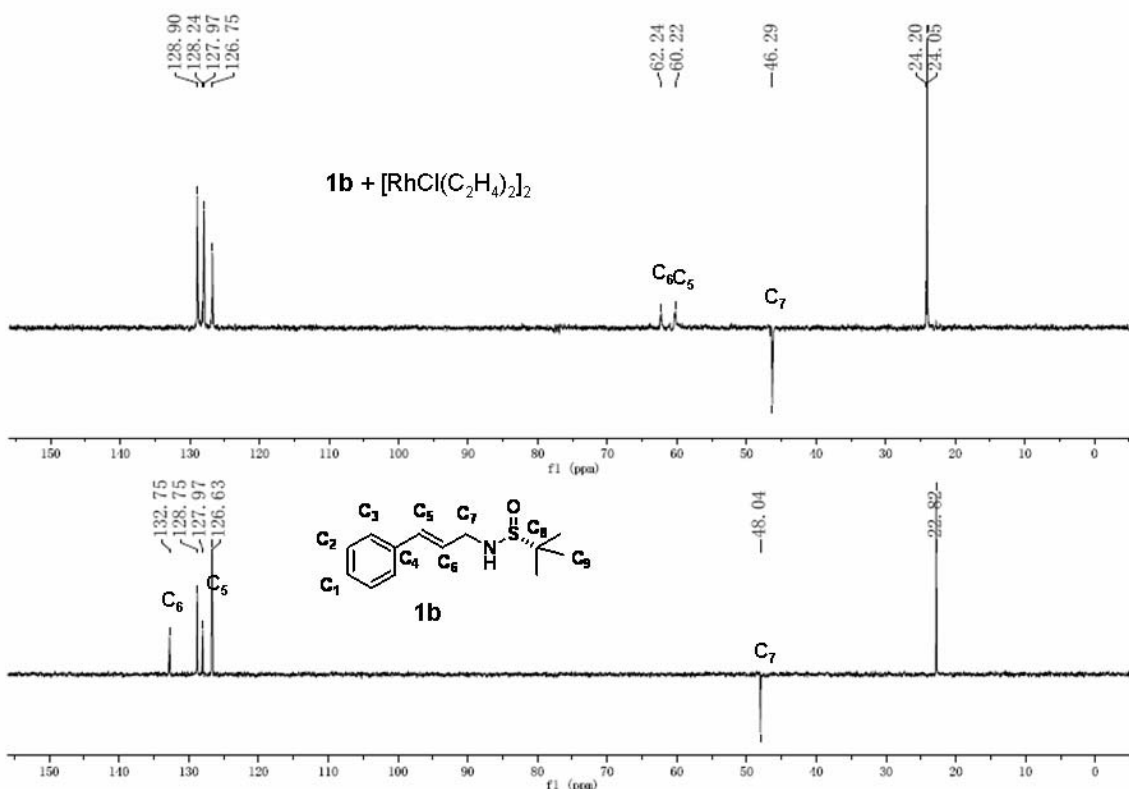

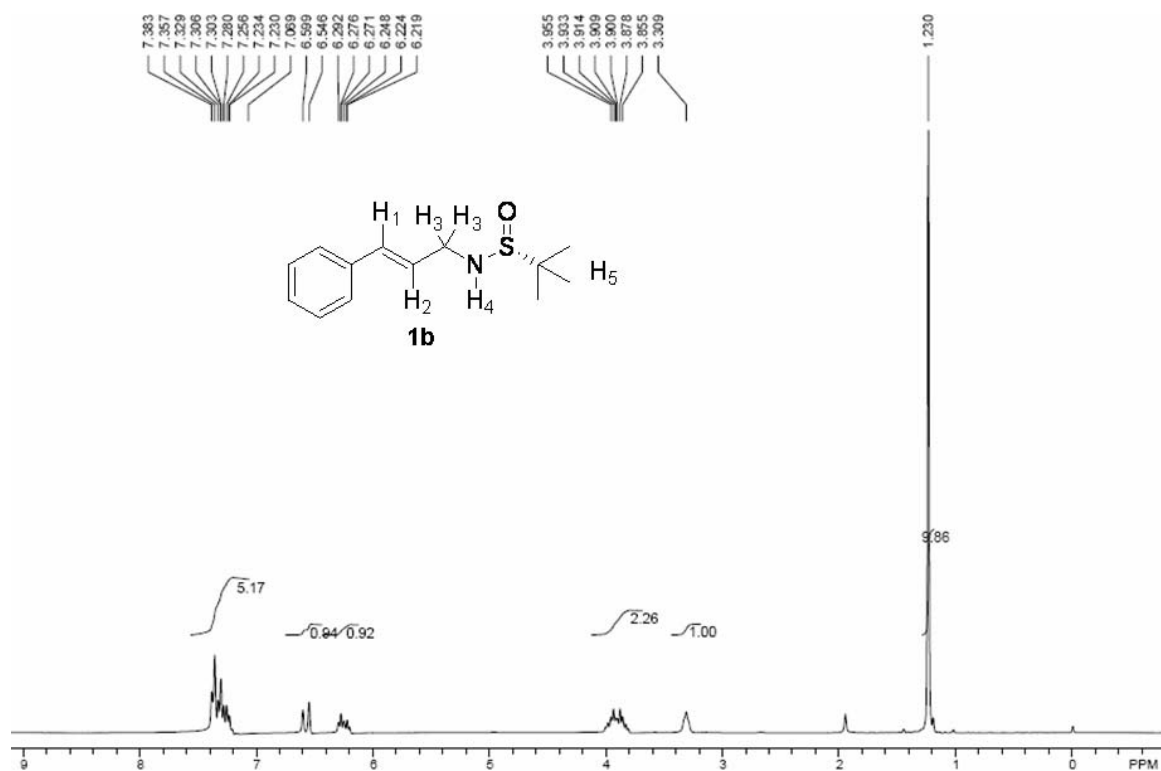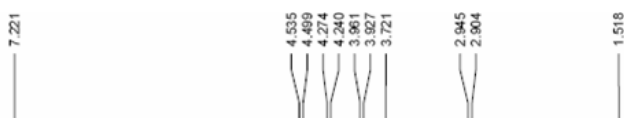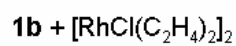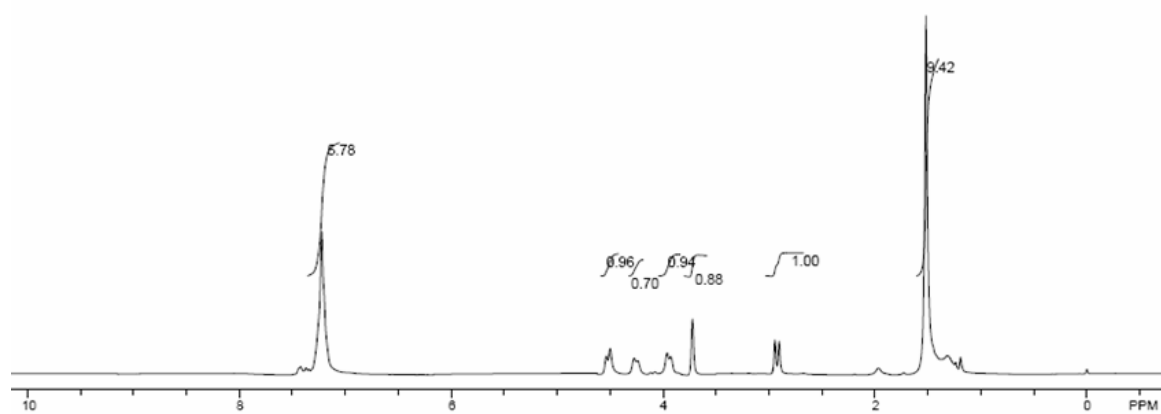

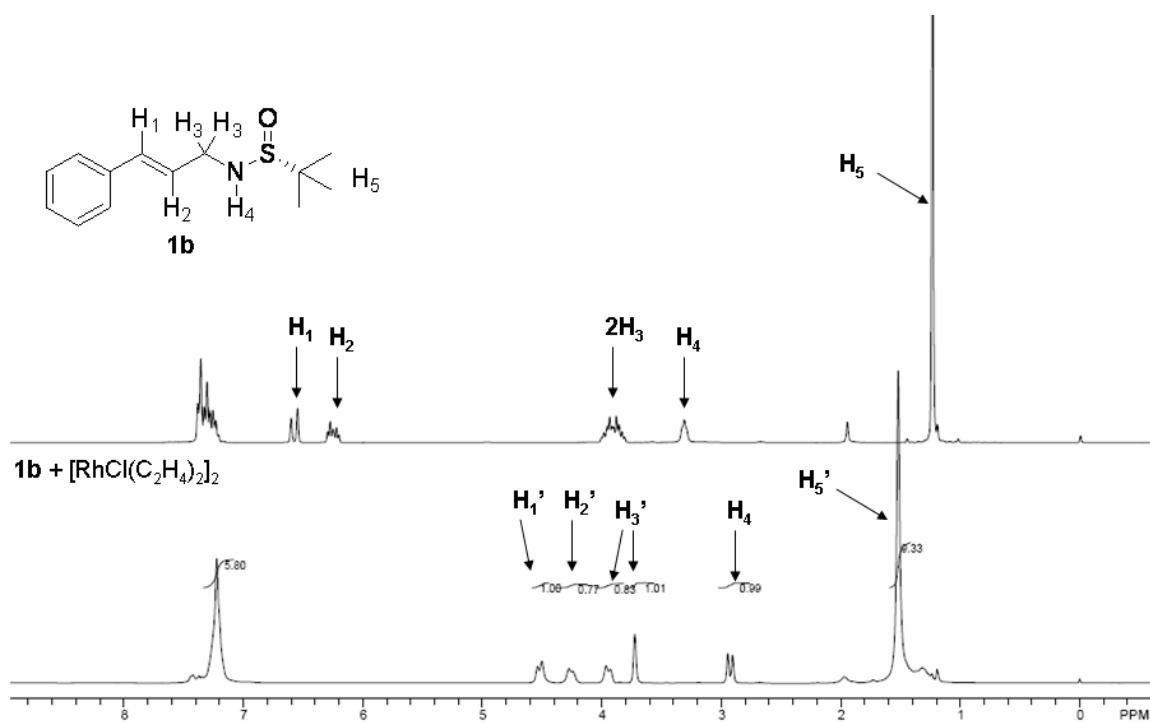

Supplement: c2ob06723d.pdf [file c2ob06723d.pdf]
